# Supplementary material for: Visible-Light-Photocatalyzed C5-H Nitration of 8-Aminoquinoline Amides
Source: MDPI journal article supplement (doi:10.3390/catal14040263), 2024-04-15

## Supporting Information

# Visible-Light-Photocatalyzed C5-H Nitration of 8-Aminoquinoline Amides

Pugen Liu, Huijie Qiao, Xiaoxue Su, Peirong Bai and Fan Yang \*

Henan Key Laboratory of Chemical Biology and Organic Chemistry, Key Laboratory of Applied Chemistry of Henan Universities, Green Catalysis Center, College of Chemistry, Zhengzhou University, Zhengzhou 450052, China; liupugen@163.com (P.L.)

\* Correspondence: yangf@zzu.edu.cn

## Table of Contents

|                                                                                                        |            |
|--------------------------------------------------------------------------------------------------------|------------|
| <b>1. General Information</b>                                                                          | <b>S2</b>  |
| <b>2. Optimization of Reaction Conditions</b>                                                          | <b>S2</b>  |
| <b>3. Typical Procedure for Synthesizing the Products</b>                                              | <b>S4</b>  |
| <b>4. References</b>                                                                                   | <b>S12</b> |
| <b>5. Copies of <math>^1\text{H}</math> and <math>^{13}\text{C}</math> NMR Spectra of the Products</b> | <b>S13</b> |

## 1. General Information

$^1\text{H}$  and  $^{13}\text{C}$  NMR spectra were recorded on a Bruker DPX-400 spectrometer with  $\text{CDCl}_3$  as the solvent and TMS as an internal standard. Melting points were measured using a WC-1 microscopic apparatus and are uncorrected. High-resolution mass spectra were obtained with MALDI-FTMS. All solvents were used directly without further purification. Dichloromethane, ethyl acetate, and hexane were used for column chromatography. The commercials were obtained from commercial sources and used as-received without further purification unless otherwise noted.

## 2. Optimization of Reaction Conditions

**Table S1.** Screening of reaction conditions<sup>a</sup>.

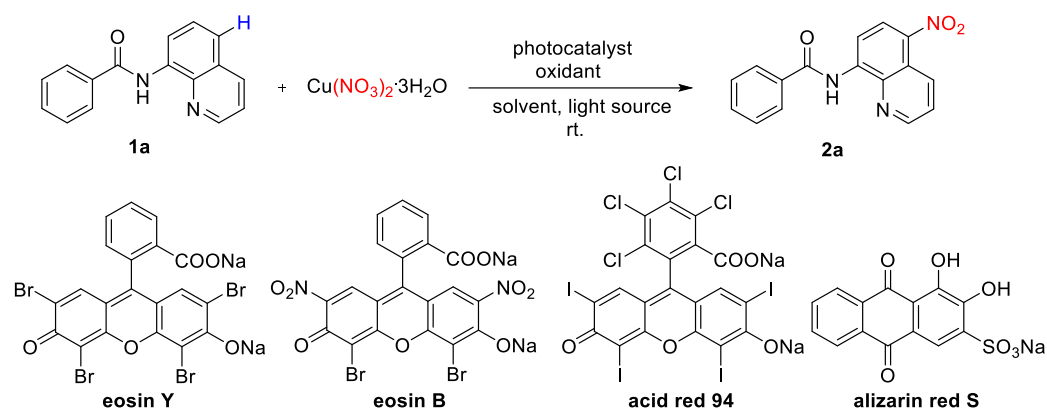

| Entry.          | Catalyst                                                       | Oxidant                                            | Solvent                | Yield (%) <sup>b</sup> |
|-----------------|----------------------------------------------------------------|----------------------------------------------------|------------------------|------------------------|
| 1               | EosinB                                                         | $\text{K}_2\text{S}_2\text{O}_8$                   | $\text{CH}_3\text{CN}$ | <5                     |
| 2               | EosinB                                                         | $\text{K}_2\text{S}_2\text{O}_8$                   | dioxane                | <5                     |
| 3               | EosinB                                                         | $\text{K}_2\text{S}_2\text{O}_8$                   | DMF                    | <5                     |
| 4               | EosinB                                                         | $\text{K}_2\text{S}_2\text{O}_8$                   | toluene                | <5                     |
| 5               | EosinB                                                         | $\text{K}_2\text{S}_2\text{O}_8$                   | acetone                | <5                     |
| 6               | EosinB                                                         | $\text{K}_2\text{S}_2\text{O}_8$                   | THF                    | <5                     |
| 7               | EosinB                                                         | $\text{K}_2\text{S}_2\text{O}_8$                   | DCM                    | 56                     |
| 8               | EosinB                                                         | $\text{K}_2\text{S}_2\text{O}_8$                   | $\text{CHCl}_3$        | 49                     |
| 9               | EosinB                                                         | $\text{K}_2\text{S}_2\text{O}_8$                   | DCE                    | <b>68</b>              |
| 10              | EosinB                                                         | $\text{K}_2\text{S}_2\text{O}_8$                   | DMSO                   | <5                     |
| 11              | EosinB                                                         | $\text{Na}_2\text{S}_2\text{O}_8$                  | DCE                    | 61                     |
| 12              | EosinB                                                         | $(\text{NH}_4)_2\text{S}_2\text{O}_8$              | DCE                    | 58                     |
| 13              | EosinB                                                         | $\text{PhI}(\text{OAc})_2$                         | DCE                    | 36                     |
| 14              | EosinB                                                         | TBHP                                               | DCE                    | <5                     |
| 15              | EosinY                                                         | $\text{K}_2\text{S}_2\text{O}_8$                   | DCE                    | 65                     |
| 16              | $\text{Ru}(\text{bpy})_3\text{Cl}_2 \cdot 6\text{H}_2\text{O}$ | $\text{K}_2\text{S}_2\text{O}_8$                   | DCE                    | 76                     |
| 17              | $\text{Ru}(\text{bpy})_3(\text{PF}_6)_2$                       | $\text{K}_2\text{S}_2\text{O}_8$                   | DCE                    | 69                     |
| 18              | $\text{Ru}(\text{bpy})_3\text{Cl}_2$                           | $\text{K}_2\text{S}_2\text{O}_8$                   | DCE                    | 75                     |
| 19              | Alizarin Red S                                                 | $\text{K}_2\text{S}_2\text{O}_8$                   | DCE                    | 72                     |
| 20              | <b>Acid Red 94</b>                                             | <b><math>\text{K}_2\text{S}_2\text{O}_8</math></b> | <b>DCE</b>             | <b>82</b>              |
| 21 <sup>c</sup> | Acid Red 94                                                    | $\text{K}_2\text{S}_2\text{O}_8$                   | DCE                    | 76                     |
| 22 <sup>d</sup> | Acid Red 94                                                    | $\text{K}_2\text{S}_2\text{O}_8$                   | DCE                    | 81                     |
| 23 <sup>e</sup> | Acid Red 94                                                    | $\text{K}_2\text{S}_2\text{O}_8$                   | DCE                    | 72                     |
| 24 <sup>f</sup> | Acid Red 94                                                    | $\text{K}_2\text{S}_2\text{O}_8$                   | DCE                    | 78                     |
| 25 <sup>g</sup> | Acid Red 94                                                    | $\text{K}_2\text{S}_2\text{O}_8$                   | DCE                    | 69                     |
| 26 <sup>h</sup> | Acid Red 94                                                    | $\text{K}_2\text{S}_2\text{O}_8$                   | DCE                    | 76                     |

|                 |             |                                              |     |    |
|-----------------|-------------|----------------------------------------------|-----|----|
| 27 <sup>i</sup> | Acid Red 94 | K <sub>2</sub> S <sub>2</sub> O <sub>8</sub> | DCE | 68 |
| 28 <sup>j</sup> | Acid Red 94 | K <sub>2</sub> S <sub>2</sub> O <sub>8</sub> | DCE | 73 |
| 29 <sup>k</sup> | Acid Red 94 | K <sub>2</sub> S <sub>2</sub> O <sub>8</sub> | DCE | 66 |
| 30 <sup>l</sup> | Acid Red 94 | K <sub>2</sub> S <sub>2</sub> O <sub>8</sub> | DCE | 62 |
| 31 <sup>m</sup> | Acid Red 94 | K <sub>2</sub> S <sub>2</sub> O <sub>8</sub> | DCE | 43 |
| 32              | —           | K <sub>2</sub> S <sub>2</sub> O <sub>8</sub> | DCE | 25 |
| 33 <sup>o</sup> | Acid Red 94 | K <sub>2</sub> S <sub>2</sub> O <sub>8</sub> | DCE | 23 |

<sup>a</sup>reaction conditions: 1a (0.20 mmol), Cu(NO<sub>3</sub>)<sub>2</sub>·3H<sub>2</sub>O (1.5 equiv), catalyst (5 mol %), oxidant (2.5 equiv), solvent (1.5 mL), and under household light at room temperature in air for 10 h; <sup>b</sup>isolated yield of **2a**; <sup>c</sup>K<sub>2</sub>S<sub>2</sub>O<sub>8</sub> (2 equiv); <sup>d</sup>K<sub>2</sub>S<sub>2</sub>O<sub>8</sub> (3 equiv); <sup>e</sup>Cu(NO<sub>3</sub>)<sub>2</sub>·3H<sub>2</sub>O (1 equiv); <sup>f</sup>Cu(NO<sub>3</sub>)<sub>2</sub>·3H<sub>2</sub>O (2 equiv); <sup>g</sup>catalyst (4 mol %); <sup>h</sup>under N<sub>2</sub>; <sup>i</sup>under O<sub>2</sub>; <sup>j</sup>for 8 h; <sup>k</sup>blue LED; <sup>l</sup>green LED; <sup>m</sup>red LED; and <sup>o</sup>in the dark.

### 3. Typical Procedure for Synthesizing the Products

(2a–2p, 2a'–2m'): To a 10 mL reaction tube, a mixture of amide (0.2 mmol), Cu(NO<sub>3</sub>)<sub>2</sub>·3H<sub>2</sub>O (0.3 mmol, 1.5 equiv), Acid Red 94 (0.01 mmol, 5 mol %), and K<sub>2</sub>S<sub>2</sub>O<sub>8</sub> (0.5 mmol, 2.5 equiv) was added in DCE (1.5 mL). The resulting mixture was stirred under the irradiation of 26 W household light under air at room temperature for 10 h. Upon completion, the mixture was filtered through a celite pad and washed with CH<sub>2</sub>Cl<sub>2</sub>, the solvent was removed under reduced pressure and then followed by recrystallization to produce the corresponding product using hexane–CH<sub>2</sub>Cl<sub>2</sub> as a solvent.

(2q, 2r, and 2n'): To a 10 mL reaction tube, a mixture of amide (0.2 mmol), Cu(NO<sub>3</sub>)<sub>2</sub>·3H<sub>2</sub>O (0.3 mmol, 1.5 equiv), Acid Red 94 (0.01 mmol, 5 mol %), K<sub>2</sub>S<sub>2</sub>O<sub>8</sub> (0.5 mmol, 2.5 equiv), and DCE (1.5 mL) was added. Upon completion, the solvent was removed under reduced pressure, and the residue was purified by silica gel column chromatography to produce the corresponding product.

**Spectral Data of Product 2** *N*-(5-nitroquinolin-8-yl)benzamide (**2a**) [1]. Yellow solid in 82% yield; mp 215–216 °C; <sup>1</sup>H NMR (400 MHz, CDCl<sub>3</sub>) δ 11.07 (s, 1H), 9.30 (d, *J* = 8.6 Hz, 1H), 9.00 (d, *J* = 8.8 Hz, 1H), 8.95 (d, *J* = 3.3 Hz, 1H), 8.59 (d, *J* = 8.8 Hz, 1H), 8.08 (d, *J* = 7.28 Hz, 2H), 7.75 (dd, *J* = 8.8, 4.1 Hz, 1H), 7.66–7.63 (m, 1H), 7.60–7.56 (m, 2H); <sup>13</sup>C NMR (100 MHz, CDCl<sub>3</sub>) δ 165.7, 149.1, 140.9, 138.7, 137.8, 134.1, 133.4, 132.7, 129.0, 127.9, 127.5, 124.7, 121.8, 113.7.

*2-methyl-N*-(5-nitroquinolin-8-yl)benzamide (**2b**) [1]. Yellow solid in 79% yield; mp 192–193 °C; <sup>1</sup>H NMR (400 MHz, CDCl<sub>3</sub>) δ 10.58 (s, 1H), 9.30 (d, *J* = 8.8 Hz, 1H), 9.01 (d, *J* = 8.8 Hz, 1H), 8.88 (d, *J* = 2.8 Hz, 1H), 8.61 (d, *J* = 8.8 Hz, 1H), 7.74–7.69 (m, 2H), 7.74–7.69 (m, 1H), 7.38–7.34 (m, 2H), 2.62 (s, 3H); <sup>13</sup>C NMR (100 MHz, CDCl<sub>3</sub>) δ 168.3, 149.1, 141.0, 138.8, 137.6, 137.3, 135.5, 133.4, 131.7, 131.1, 127.9, 127.3, 126.2, 124.7, 121.8, 113.7, 20.3.

*3-methyl-N*-(5-nitroquinolin-8-yl)benzamide (**2c**). Yellow solid in 82% yield; mp 201–202 °C; <sup>1</sup>H NMR (400 MHz, CDCl<sub>3</sub>) δ 11.04 (s, 1H), 9.30 (d, *J* = 8.5 Hz, 1H), 9.01 (d, *J* = 8.9 Hz, 1H), 8.96 (d, *J* = 2.8 Hz, 1H), 8.60 (d, *J* = 8.8 Hz, 1H), 7.88 (d, *J* = 11.9 Hz, 2H), 7.75 (dd, *J* = 9.1, 4.1 Hz, 1H), 7.49–7.45 (m, 2H), 2.49 (s, 3H); <sup>13</sup>C NMR (100 MHz, CDCl<sub>3</sub>) δ 165.94, 149.1, 141.0, 139.0, 138.6, 137.8, 134.2, 133.4, 128.9, 128.2, 127.9, 124.7, 124.4, 121.8, 113.7, 21.5; HRMS (ESI): calculated for C<sub>17</sub>H<sub>13</sub>N<sub>3</sub>O<sub>3</sub>: [M+H]<sup>+</sup> requires 308.1030; found 308.1031.

*4-methyl-N*-(5-nitroquinolin-8-yl)benzamide (**2d**) [2]. Yellow solid in 80% yield; mp 210–211 °C; <sup>1</sup>H NMR (400 MHz, CDCl<sub>3</sub>) δ 11.05 (s, 1H), 9.31 (d, *J* = 8.7 Hz, 1H), 9.02 (d, *J* = 8.8 Hz, 1H), 8.96 (d, *J* = 3.4 Hz, 1H), 8.61 (d, *J* = 8.8 Hz, 1H), 7.99 (d, *J* = 7.8 Hz, 2H), 7.74 (dd, *J* = 8.9, 4.1 Hz, 1H), 7.38 (d, *J* = 7.9 Hz, 2H), 2.48 (s, 3H); <sup>13</sup>C NMR (100 MHz, CDCl<sub>3</sub>) δ 165.7, 149.0, 143.4, 141.0, 138.6, 137.8, 133.5, 131.4, 129.7, 128.0, 127.5, 124.7, 121.9, 113.7, 21.6; HRMS (ESI): calculated for C<sub>17</sub>H<sub>13</sub>N<sub>3</sub>O<sub>3</sub>: [M+H]<sup>+</sup> requires 308.1030; found 308.1033.

*2-methoxy-N*-(5-nitroquinolin-8-yl)benzamide (**2e**). Yellow solid in 75% yield; mp 208–209 °C; <sup>1</sup>H NMR (400 MHz, CDCl<sub>3</sub>) δ 12.68 (s, 1H), 9.26 (d, *J* = 7.9 Hz, 1H), 9.06 (d, *J* = 8.9 Hz, 1H), 8.93 (d, *J* = 2.8 Hz, 1H), 8.56 (d, *J* = 8.8 Hz, 1H), 8.31 (d, *J* = 6.7 Hz, 1H), 7.69 (dd, *J* = 8.8, 4.1 Hz, 1H), 7.57–7.54 (m, 1H), 7.17–7.14 (m, 1H), 7.08 (d, *J* = 8.2 Hz, 1H), 4.20 (s, 3H); <sup>13</sup>C

NMR (100 MHz, CDCl<sub>3</sub>)  $\delta$  164.2, 157.9, 148.9, 142.2, 138.4, 138.2, 134.0, 133.1, 132.6, 128.1, 124.4, 121.9, 121.5, 121.4, 114.4, 111.7, 56.2; HRMS (ESI): calculated for C<sub>17</sub>H<sub>13</sub>N<sub>3</sub>O<sub>4</sub>: [M+H]<sup>+</sup> requires 324.0979; found 324.0977.

*4-methoxy-N-(5-nitroquinolin-8-yl)benzamide (2f)* [3]. Yellow solid in 78% yield; mp 260-261 °C; <sup>1</sup>H NMR (400 MHz, CDCl<sub>3</sub>)  $\delta$  11.03 (s, 1H), 9.34 (d, *J* = 8.6 Hz, 1H), 9.01 (d, *J* = 8.9 Hz, 1H), 8.96 (d, *J* = 3.6 Hz, 1H), 8.63 (d, *J* = 8.9 Hz, 1H), 8.07 (d, *J* = 8.7 Hz, 2H), 7.76 (dd, *J* = 8.9, 4.1 Hz, 1H), 7.07 (d, *J* = 8.6 Hz, 2H), 3.92 (s, 3H); <sup>13</sup>C NMR (100 MHz, CDCl<sub>3</sub>)  $\delta$  165.2, 163.2, 149.0, 141.2, 138.5, 137.8, 133.5, 129.5, 128.1, 126.4, 124.7, 121.9, 114.3, 113.5, 55.6.

*3,5-dimethoxy-N-(5-nitroquinolin-8-yl)benzamide (2g)*. Yellow solid in 78% yield; mp 200-201 °C; <sup>1</sup>H NMR (400 MHz, CDCl<sub>3</sub>)  $\delta$  11.00 (s, 1H), 9.30 (d, *J* = 8.8 Hz, 1H), 8.99-8.95 (m, 2H), 8.61 (d, *J* = 8.8 Hz, 1H), 7.76 (dd, *J* = 8.9, 4.1 Hz, 1H), 7.20 (s, 2H), 6.71 (s, 2H), 3.91 (s, 6H); <sup>13</sup>C NMR (100 MHz, CDCl<sub>3</sub>)  $\delta$  165.6, 161.2, 149.2, 140.8, 138.8, 137.8, 136.3, 133.4, 127.9, 124.8, 121.8, 113.8, 105.5, 104.4, 55.7; HRMS (ESI): calculated for C<sub>18</sub>H<sub>15</sub>N<sub>3</sub>O<sub>5</sub>: [M+H]<sup>+</sup> requires 354.1084; found 354.1087.

*3-fluoro-N-(5-nitroquinolin-8-yl)benzamide (2h)*. Yellow solid in 73% yield; mp 236-237 °C; <sup>1</sup>H NMR (400 MHz, CDCl<sub>3</sub>)  $\delta$  11.06 (s, 1H), 9.31 (d, *J* = 8.7 Hz, 1H), 9.01-8.98 (m, 2H), 8.61 (d, *J* = 8.8 Hz, 1H), 7.88 (d, *J* = 7.6 Hz, 1H), 7.80-7.76 (m, 2H), 7.60-7.55 (m, 1H), 7.36-7.33 (m, 1H); <sup>13</sup>C NMR (100 MHz, CDCl<sub>3</sub>)  $\delta$  164.4, 163.0, 149.2, 140.5, 139.0, 137.8, 136.4, 133.5, 130.8, 127.8, 124.8, 122.9, 121.8, 119.7, 114.9, 113.9; HRMS (ESI): calculated for C<sub>16</sub>H<sub>10</sub>FN<sub>3</sub>O<sub>3</sub>: [M+H]<sup>+</sup> requires 312.0779; found 312.0781.

*4-fluoro-N-(5-nitroquinolin-8-yl)benzamide (2i)*. Yellow solid in 75% yield; mp 218-219 °C; <sup>1</sup>H NMR (400 MHz, CDCl<sub>3</sub>)  $\delta$  11.03 (s, 1H), 9.31 (d, *J* = 8.6 Hz, 1H), 9.01-8.96 (m, 2H), 8.60 (d, *J* = 8.8 Hz, 1H), 8.13-8.09 (m, 2H), 7.77 (dd, *J* = 9.2, 4.1 Hz, 1H), 7.29-7.24 (m, 2H); <sup>13</sup>C NMR (100 MHz, CDCl<sub>3</sub>)  $\delta$  165.5, 164.6, 149.1, 140.7, 138.8, 137.7, 133.5, 130.4, 130.0, 127.9, 124.8, 121.8, 116.2, 113.7; HRMS (ESI): calculated for C<sub>16</sub>H<sub>10</sub>FN<sub>3</sub>O<sub>3</sub>: [M+H]<sup>+</sup> requires 312.0779; found 312.0778.

*3-chloro-N-(5-nitroquinolin-8-yl)benzamide (2j)*. Yellow solid in 74% yield; mp 234-235 °C; <sup>1</sup>H NMR (400 MHz, CDCl<sub>3</sub>)  $\delta$  11.04 (s, 1H), 9.31 (d, *J* = 8.7 Hz, 1H), 8.99 (d, *J* = 8.8 Hz, 2H), 8.62 (d, *J* = 8.8 Hz, 1H), 8.07 (s, 1H), 7.96 (d, *J* = 7.5 Hz, 1H), 7.78 (dd, *J* = 9.1, 4.1 Hz, 1H), 7.62 (d, *J* = 7.8 Hz, 1H), 7.52 (t, *J* = 7.8 Hz, 1H); <sup>13</sup>C NMR (100 MHz, CDCl<sub>3</sub>)  $\delta$  164.4, 149.2, 140.5, 139.0, 137.8, 135.9, 135.3, 133.5, 132.7, 130.3, 127.9, 127.8, 125.4, 124.8, 121.8, 114.0; HRMS (ESI): calculated for C<sub>16</sub>H<sub>10</sub>ClN<sub>3</sub>O<sub>3</sub>: [M+H]<sup>+</sup> requires 328.0483; found 328.0483.

*4-chloro-N-(5-nitroquinolin-8-yl)benzamide (2k)* [2]. Yellow solid in 76% yield; mp 210-212 °C; <sup>1</sup>H NMR (400 MHz, CDCl<sub>3</sub>)  $\delta$  11.05 (s, 1H), 9.32 (d, *J* = 8.1 Hz, 1H), 9.01-8.97 (m, 2H), 8.62 (d, *J* = 8.8 Hz, 1H), 8.04 (d, *J* = 8.5 Hz, 2H), 7.77 (dd, *J* = 9.1, 4.1 Hz, 1H), 7.56 (d, *J* = 8.4 Hz, 2H); <sup>13</sup>C NMR (100 MHz, CDCl<sub>3</sub>)  $\delta$  164.7, 149.2, 140.6, 139.1, 138.9, 137.8, 133.5, 132.5, 129.4, 128.9, 127.8, 124.8, 121.8, 113.9; HRMS (ESI): calculated for C<sub>16</sub>H<sub>10</sub>ClN<sub>3</sub>O<sub>3</sub>: [M+H]<sup>+</sup> requires 328.0483; found 328.0484.

*3-bromo-N-(5-nitroquinolin-8-yl)benzamide (2l)*. Yellow solid in 78% yield; mp 213-214 °C; <sup>1</sup>H NMR (400 MHz, CDCl<sub>3</sub>)  $\delta$  11.00 (s, 1H), 9.36 (d, *J* = 8.8 Hz, 1H), 8.96 (d, *J* = 8.9 Hz, 2H), 8.61 (d, *J* = 8.8 Hz, 1H), 8.23 (s, 1H), 8.01 (d, *J* = 7.7 Hz, 1H), 7.78-7.75 (m, 2H), 7.49 (t, *J* = 7.8 Hz, 1H); <sup>13</sup>C NMR (100 MHz, CDCl<sub>3</sub>)  $\delta$  164.2, 149.2, 140.4, 139.0, 137.8, 136.1, 135.6, 133.5, 130.8, 130.5, 127.8, 125.9, 124.8, 123.3, 121.8, 114.0; HRMS (ESI): calculated for C<sub>16</sub>H<sub>10</sub>BrN<sub>3</sub>O<sub>3</sub>: [M+H]<sup>+</sup> requires 371.9978; found 371.9979.

*4-bromo-N-(5-nitroquinolin-8-yl)benzamide (2m)*. Yellow solid in 72% yield; mp 279-280 °C; <sup>1</sup>H NMR (400 MHz, CDCl<sub>3</sub>)  $\delta$  11.06 (s, 1H), 9.32 (d, *J* = 8.2 Hz, 1H), 9.01-8.97 (m, 2H), 8.62 (d, *J* = 8.9 Hz, 1H), 7.96 (d, *J* = 8.3 Hz, 2H), 7.78 (dd, *J* = 8.9, 4.3 Hz, 1H), 7.72 (d, *J* = 8.5 Hz, 2H); <sup>13</sup>C NMR (100 MHz, CDCl<sub>3</sub>)  $\delta$  164.8, 149.2, 140.6, 138.9, 137.8, 133.5, 133.0, 132.3, 129.0, 127.8, 127.6, 124.8, 121.8, 113.9; HRMS (ESI): calculated for C<sub>16</sub>H<sub>10</sub>BrN<sub>3</sub>O<sub>3</sub>: [M+H]<sup>+</sup> requires 371.9978; found 371.9977.

*N-(5-nitroquinolin-8-yl)-3-(trifluoromethyl)benzamide (2n)*. Yellow solid in 75% yield; mp 181-182 °C; <sup>1</sup>H NMR (400 MHz, CDCl<sub>3</sub>)  $\delta$  11.08 (s, 1H), 9.30 (d, *J* = 8.6 Hz, 1H), 8.99-8.97 (m, 2H), 8.61 (d, *J* = 8.8 Hz, 1H), 8.36 (s, 1H), 8.25 (d, *J* = 7.6 Hz, 1H), 7.90 (d, *J* = 7.6 Hz, 1H), 7.79-7.72 (m, 2H); <sup>13</sup>C NMR (100 MHz, CDCl<sub>3</sub>)  $\delta$  164.2, 149.3, 140.3, 139.1, 137.7, 135.0,

133.7, 133.5, 130.4, 129.7, 129.2, 127.7, 124.9, 124.7, 122.1, 114.0; HRMS (ESI): calculated for  $C_{17}H_{10}F_3N_3O_3$ :  $[M+H]^+$  requires 362.0747; found 362.0748.

*2-chloro-4-methoxy-N-(5-nitroquinolin-8-yl)benzamide (2p)*. Yellow solid in 65% yield; mp 262-263 °C;  $^1H$  NMR (400 MHz,  $CDCl_3$ )  $\delta$  10.99 (s, 1H), 9.33 (d,  $J$  = 8.8 Hz, 1H), 8.99-8.97 (m, 2H), 8.62 (d,  $J$  = 8.8 Hz, 1H), 8.14 (d,  $J$  = 1.2 Hz, 1H), 8.02 (d,  $J$  = 8.6 Hz, 1H), 7.77 (dd,  $J$  = 8.9, 4.1 Hz, 1H), 7.10 (d,  $J$  = 8.5 Hz, 1H), 4.03 (s, 3H);  $^{13}C$  NMR (100 MHz,  $CDCl_3$ )  $\delta$  164.1, 158.5, 149.1, 140.8, 138.7, 137.8, 133.5, 129.7, 127.9, 127.7, 127.2, 124.8, 123.3, 121.9, 113.7, 111.8, 56.5; HRMS (ESI): calculated for  $C_{17}H_{12}ClN_3O_4$ :  $[M+H]^+$  requires 358.0589; found 358.0591.

*N-(5-nitroquinolin-8-yl)thiophene-2-carboxamide (2q)* [3]. Yellow solid in 69% yield; mp 220-221 °C;  $^1H$  NMR (400 MHz,  $CDCl_3$ )  $\delta$  10.90 (s, 1H), 9.30 (d,  $J$  = 8.8 Hz, 1H), 8.96-8.95 (m, 1H), 8.91 (d,  $J$  = 8.8 Hz, 1H), 8.59 (d,  $J$  = 8.8 Hz, 1H), 7.88 (d,  $J$  = 3.1 Hz, 1H), 7.76 (dd,  $J$  = 8.9, 4.1 Hz, 1H), 7.65 (d,  $J$  = 4.8 Hz, 1H), 7.24-7.21 (m, 1H);  $^{13}C$  NMR (100 MHz,  $CDCl_3$ )  $\delta$  160.2, 149.1, 140.6, 139.0, 138.7, 137.5, 133.5, 132.2, 129.4, 128.2, 127.9, 124.8, 121.9, 113.7.

*N-(5-nitroquinolin-8-yl)pivalamide (2r)*<sup>2</sup>. Yellow solid in 73% yield; mp 172-173 °C;  $^1H$  NMR (400 MHz,  $CDCl_3$ )  $\delta$  10.59 (s, 1H), 9.27-9.25 (m, 1H), 8.92 (d,  $J$  = 3.0 Hz, 1H), 8.84 (d,  $J$  = 8.8 Hz, 1H), 8.54 (d,  $J$  = 8.8 Hz, 1H), 7.71 (dd,  $J$  = 8.8, 4.1 Hz, 1H), 1.45 (s, 9H);  $^{13}C$  NMR (100 MHz,  $CDCl_3$ )  $\delta$  177.8, 149.0, 141.0, 138.3, 137.7, 133.3, 127.9, 124.6, 121.7, 113.4, 40.7, 27.6.

*N-(2-methyl-5-nitroquinolin-8-yl)benzamide (2a')* [2]. Yellow solid in 75% yield; mp 202-203 °C;  $^1H$  NMR (400 MHz,  $CDCl_3$ )  $\delta$  11.08 (s, 1H), 9.12 (d,  $J$  = 8.9 Hz, 1H), 8.91 (d,  $J$  = 8.8, 1H), 8.49 (d,  $J$  = 8.8 Hz, 1H), 8.05 (d,  $J$  = 7.3 Hz, 2H), 7.66-7.57 (m, 4H), 2.81 (s, 3H);  $^{13}C$  NMR (100 MHz,  $CDCl_3$ )  $\delta$  165.5, 158.5, 140.1, 138.7, 137.3, 134.3, 133.3, 132.6, 129.1, 127.4, 126.7, 125.6, 119.9, 113.7, 25.2; HRMS (ESI): calculated for  $C_{17}H_{13}N_3O_3$ :  $[M+H]^+$  requires 308.1030; found 308.1035.

*2-methyl-N-(2-methyl-5-nitroquinolin-8-yl)benzamide (2b')*. Yellow solid in 75% yield; mp 209-210 °C;  $^1H$  NMR (400 MHz,  $CDCl_3$ )  $\delta$  10.62 (s, 1H), 9.15 (d,  $J$  = 8.9 Hz, 1H), 8.96 (d,  $J$  = 8.8, 1H), 8.51 (d,  $J$  = 8.8 Hz, 1H), 7.72 (d,  $J$  = 7.4 Hz, 1H), 7.58 (d,  $J$  = 8.9 Hz, 1H), 7.48-7.44 (m, 1H), 7.39-7.35 (m, 2H), 2.75 (s, 3H), 2.64 (s, 3H);  $^{13}C$  NMR (100 MHz,  $CDCl_3$ )  $\delta$  168.2, 158.6, 140.3, 138.9, 137.2, 137.2, 135.6, 133.3, 131.8, 131.1, 127.5, 126.7, 126.3, 125.6, 120.0, 113.7, 25.1, 20.4; HRMS (ESI): calculated for  $C_{18}H_{15}N_3O_3$ :  $[M+H]^+$  requires 322.1186; found 322.1190.

*3-methyl-N-(2-methyl-5-nitroquinolin-8-yl)benzamide (2c')*. Yellow solid in 79% yield; mp 184-185 °C;  $^1H$  NMR (400 MHz,  $CDCl_3$ )  $\delta$  11.04 (s, 1H), 9.15 (d,  $J$  = 8.9 Hz, 1H), 8.93 (d,  $J$  = 8.8 Hz, 1H), 8.51 (d,  $J$  = 8.8 Hz, 1H), 7.91 (s, 1H), 7.81 (d,  $J$  = 6.9 Hz, 1H), 7.59 (d,  $J$  = 8.9 Hz, 1H), 7.49-7.43 (m, 2H), 2.83 (s, 3H), 2.47 (s, 3H);  $^{13}C$  NMR (100 MHz,  $CDCl_3$ )  $\delta$  165.7, 158.4, 140.2, 139.0, 138.7, 137.3, 134.3, 133.4, 133.3, 128.9, 128.3, 126.8, 125.6, 124.2, 120.0, 113.7, 25.2, 21.5; HRMS (ESI): calculated for  $C_{18}H_{15}N_3O_3$ :  $[M+H]^+$  requires 322.1186; found 322.1190.

*4-methyl-N-(2-methyl-5-nitroquinolin-8-yl)benzamide (2d')*. Yellow solid in 78% yield; mp 206-207 °C;  $^1H$  NMR (400 MHz,  $CDCl_3$ )  $\delta$  10.99 (s, 1H), 9.09 (d,  $J$  = 8.9 Hz, 1H), 8.86 (d,  $J$  = 8.8 Hz, 1H), 8.44 (d,  $J$  = 8.8 Hz, 1H), 7.92 (d,  $J$  = 7.9 Hz, 2H), 7.55 (d,  $J$  = 8.9 Hz, 1H), 7.37 (d,  $J$  = 7.8 Hz, 2H), 2.81 (s, 3H), 2.45 (s, 3H);  $^{13}C$  NMR (100 MHz,  $CDCl_3$ )  $\delta$  165.4, 158.4, 143.3, 140.2, 138.5, 137.2, 133.2, 131.3, 129.7, 127.4, 126.8, 125.6, 120.0, 113.5, 25.2, 21.6; HRMS (ESI): calculated for  $C_{18}H_{15}N_3O_3$ :  $[M+H]^+$  requires 322.1186; found 322.1189.

*2-methoxy-N-(2-methyl-5-nitroquinolin-8-yl)benzamide (2e')*. Yellow solid in 75% yield; mp 258-259 °C;  $^1H$  NMR (400 MHz,  $CDCl_3$ )  $\delta$  12.46 (s, 1H), 9.17 (d,  $J$  = 8.9 Hz, 1H), 9.10 (d,  $J$  = 8.9 Hz, 1H), 8.51 (d,  $J$  = 8.9 Hz, 1H), 8.33 (d,  $J$  = 6.6 Hz, 1H), 7.60-7.55 (m, 2H), 7.18 (t,  $J$  = 7.6 Hz, 1H), 7.11 (d,  $J$  = 8.3 Hz, 1H), 4.23 (s, 3H), 2.86 (s, 3H);  $^{13}C$  NMR (100 MHz,  $CDCl_3$ )  $\delta$  164.3, 157.9, 157.8, 141.6, 137.8, 134.0, 133.2, 132.8, 127.0, 125.3, 121.7, 121.6, 120.1, 114.7, 111.6, 56.2, 25.3; HRMS (ESI): calculated for  $C_{18}H_{15}N_3O_4$ :  $[M+H]^+$  requires 338.1135; found 338.1139.

*3-fluoro-N-(2-methyl-5-nitroquinolin-8-yl)benzamide (2f')*. Yellow solid in 71% yield; mp 251-252 °C;  $^1H$  NMR (400 MHz,  $CDCl_3$ )  $\delta$  11.10 (s, 1H), 9.17 (d,  $J$  = 8.9 Hz, 1H), 8.94 (d,  $J$  =

8.8 Hz, 1H), 8.53 (d,  $J$  = 8.8 Hz, 1H), 7.85 (d,  $J$  = 7.7 Hz, 1H), 7.78 (d,  $J$  = 9.2 Hz, 1H), 7.63-7.55 (m, 2H), 7.36-7.32 (m, 1H), 2.84 (s, 3H);  $^{13}\text{C}$  NMR (100 MHz,  $\text{CDCl}_3$ )  $\delta$  164.3, 161.8, 158.7, 139.8, 139.1, 137.4, 136.6, 133.5, 130.8, 126.7, 125.7, 122.8, 120.0, 119.6, 114.9, 113.9, 25.3; HRMS (ESI): calculated for  $\text{C}_{17}\text{H}_{12}\text{FN}_3\text{O}_3$ :  $[\text{M}+\text{H}]^+$  requires 326.0935; found 326.0938.

*4-fluoro-N-(2-methyl-5-nitroquinolin-8-yl)benzamide (2g')*. Yellow solid in 66% yield; mp 218-219 °C;  $^1\text{H}$  NMR (400 MHz,  $\text{CDCl}_3$ )  $\delta$  11.07 (s, 1H), 9.16 (d,  $J$  = 8.9 Hz, 1H), 8.93 (d,  $J$  = 8.8, 1H), 8.52 (d,  $J$  = 8.8 Hz, 1H), 8.11-8.08 (m, 2H), 7.62 (d,  $J$  = 8.9 Hz, 1H), 7.29-7.25 (m, 2H), 2.83 (s, 3H);  $^{13}\text{C}$  NMR (100 MHz,  $\text{CDCl}_3$ )  $\delta$  166.7, 164.3, 158.5, 140.0, 138.9, 137.3, 133.5, 130.5, 129.9, 126.7, 125.7, 120.0, 116.2, 113.8, 25.3; HRMS (ESI): calculated for  $\text{C}_{17}\text{H}_{12}\text{FN}_3\text{O}_3$ :  $[\text{M}+\text{H}]^+$  requires 326.0935; found 326.0938.

*3-chloro-N-(2-methyl-5-nitroquinolin-8-yl)benzamide (2h')*. Yellow solid in 67% yield; mp 215-216 °C;  $^1\text{H}$  NMR (400 MHz,  $\text{CDCl}_3$ )  $\delta$  11.08 (s, 1H), 9.15 (d,  $J$  = 8.9 Hz, 1H), 8.91 (d,  $J$  = 8.8 Hz, 1H), 8.51 (d,  $J$  = 8.8 Hz, 1H), 8.07 (s, 1H), 7.94 (d,  $J$  = 7.6 Hz, 1H), 7.62 (d,  $J$  = 9.2 Hz, 2H), 7.53 (t,  $J$  = 7.8 Hz, 1H), 2.83 (s, 3H);  $^{13}\text{C}$  NMR (100 MHz,  $\text{CDCl}_3$ )  $\delta$  164.1, 158.7, 139.7, 139.1, 137.3, 136.1, 135.4, 133.4, 132.6, 130.3, 127.9, 126.6, 125.7, 125.2, 120.0, 113.9, 25.3; HRMS (ESI): calculated for  $\text{C}_{17}\text{H}_{12}\text{ClN}_3\text{O}_3$ :  $[\text{M}+\text{H}]^+$  requires 342.0640; found 342.0642.

*4-chloro-N-(2-methyl-5-nitroquinolin-8-yl)benzamide (2i')* [2]. Yellow solid in 68% yield; mp 221-222 °C;  $^1\text{H}$  NMR (400 MHz,  $\text{CDCl}_3$ )  $\delta$  11.08 (s, 1H), 9.16 (d,  $J$  = 8.9 Hz, 1H), 8.93 (d,  $J$  = 8.8 Hz, 1H), 8.52 (d,  $J$  = 8.8 Hz, 1H), 8.02 (d,  $J$  = 8.2 Hz, 2H), 7.62 (d,  $J$  = 8.9 Hz, 1H), 7.56 (d,  $J$  = 8.2 Hz, 2H), 2.84 (s, 3H);  $^{13}\text{C}$  NMR (100 MHz,  $\text{CDCl}_3$ )  $\delta$  164.5, 158.6, 139.9, 140.0, 139.0, 137.3, 133.5, 132.7, 129.4, 128.8, 126.7, 125.7, 120.0, 113.9, 25.3; HRMS (ESI): calculated for  $\text{C}_{17}\text{H}_{12}\text{ClN}_3\text{O}_3$ :  $[\text{M}+\text{H}]^+$  requires 342.0640; found 342.0641.

*3-bromo-N-(2-methyl-5-nitroquinolin-8-yl)benzamide (2j')*. Yellow solid in 66% yield; mp 203-204 °C;  $^1\text{H}$  NMR (400 MHz,  $\text{CDCl}_3$ )  $\delta$  11.09 (s, 1H), 9.16 (d,  $J$  = 8.9 Hz, 1H), 8.91 (d,  $J$  = 8.8 Hz, 1H), 8.51 (d,  $J$  = 8.8 Hz, 1H), 8.23 (s, 1H), 7.99 (d,  $J$  = 7.7 Hz, 1H), 7.76 (d,  $J$  = 7.9 Hz, 1H), 7.62 (d,  $J$  = 8.9 Hz, 1H), 7.47 (t,  $J$  = 7.8 Hz, 1H), 2.88 (s, 3H);  $^{13}\text{C}$  NMR (100 MHz,  $\text{CDCl}_3$ )  $\delta$  164.0, 158.7, 139.7, 139.1, 137.3, 136.2, 135.5, 133.4, 130.9, 130.5, 126.6, 125.7, 125.7, 123.3, 119.9, 113.9, 25.3; HRMS (ESI): calculated for  $\text{C}_{17}\text{H}_{12}\text{BrN}_3\text{O}_3$ :  $[\text{M}+\text{H}]^+$  requires 386.0135; found 386.0136.

*4-bromo-N-(2-methyl-5-nitroquinolin-8-yl)benzamide (2k')*. Yellow solid in 71% yield; mp 249-250 °C;  $^1\text{H}$  NMR (400 MHz,  $\text{CDCl}_3$ )  $\delta$  11.09 (s, 1H), 9.15 (d,  $J$  = 8.9 Hz, 1H), 9.17 (d,  $J$  = 9.0, 1H), 8.93 (d,  $J$  = 8.8 Hz, 1H), 8.52 (d,  $J$  = 8.8 Hz, 1H), 7.94 (d,  $J$  = 8.4 Hz, 2H), 7.44 (d,  $J$  = 8.4 Hz, 2H), 7.61 (d,  $J$  = 8.9 Hz, 1H), 2.83 (s, 3H);  $^{13}\text{C}$  NMR (100 MHz,  $\text{CDCl}_3$ )  $\delta$  164.7, 158.6, 139.8, 139.0, 137.3, 133.5, 133.2, 132.4, 128.9, 127.5, 126.7, 125.7, 120.0, 113.9, 25.3; HRMS (ESI): calculated for  $\text{C}_{17}\text{H}_{12}\text{BrN}_3\text{O}_3$ :  $[\text{M}+\text{H}]^+$  requires 386.0135; found 386.0136.

*N-(2-methyl-5-nitroquinolin-8-yl)-3-(trifluoromethyl)benzamide (2l')*. Yellow solid in 56% yield; mp 191-192 °C;  $^1\text{H}$  NMR (400 MHz,  $\text{CDCl}_3$ )  $\delta$  11.19 (s, 1H), 9.15 (d,  $J$  = 8.9 Hz, 1H), 8.92 (d,  $J$  = 8.8 Hz, 1H), 8.53 (d,  $J$  = 8.8 Hz, 1H), 8.34 (s, 1H), 8.26 (d,  $J$  = 7.7 Hz, 1H), 7.90 (d,  $J$  = 7.7 Hz, 1H), 7.74 (t,  $J$  = 7.7 Hz, 1H), 7.63 (d,  $J$  = 8.9 Hz, 1H), 2.84 (s, 3H);  $^{13}\text{C}$  NMR (100 MHz,  $\text{CDCl}_3$ )  $\delta$  164.0, 158.7, 139.6, 139.2, 137.3, 135.1, 133.5, 131.7, 130.5, 129.8, 129.1, 126.6, 125.8, 124.5, 123.6, 119.9, 113.9, 25.2; HRMS (ESI): calculated for  $\text{C}_{18}\text{H}_{12}\text{F}_3\text{N}_3\text{O}_3$ :  $[\text{M}+\text{H}]^+$  requires 376.0904; found 376.0907.

*N-(2-methyl-5-nitroquinolin-8-yl)-4-(trifluoromethyl)benzamide (2m')*. Yellow solid in 59% yield; mp 208-209 °C;  $^1\text{H}$  NMR (400 MHz,  $\text{CDCl}_3$ )  $\delta$  11.16 (s, 1H), 9.18 (d,  $J$  = 8.9 Hz, 1H), 8.96 (d,  $J$  = 8.8 Hz, 1H), 8.54 (d,  $J$  = 8.8 Hz, 1H), 8.20 (d,  $J$  = 8.0 Hz, 2H), 7.87 (d,  $J$  = 8.1 Hz, 2H), 7.64 (d,  $J$  = 8.9 Hz, 1H), 2.84 (s, 3H);  $^{13}\text{C}$  NMR (100 MHz,  $\text{CDCl}_3$ )  $\delta$  164.3, 158.7, 139.6, 139.3, 137.6, 137.4, 134.1, 133.5, 127.9, 126.6, 126.2, 125.8, 123.6, 120.0, 114.1, 25.3; HRMS (ESI): calculated for  $\text{C}_{18}\text{H}_{12}\text{F}_3\text{N}_3\text{O}_3$ :  $[\text{M}+\text{H}]^+$  requires 376.0904; found 376.0905.

*N-(2-methyl-5-nitroquinolin-8-yl)thiophene-2-carboxamide (2n')*. Yellow solid in 72% yield; mp 257-258 °C;  $^1\text{H}$  NMR (400 MHz,  $\text{CDCl}_3$ )  $\delta$  10.98 (s, 1H), 9.16 (d,  $J$  = 8.8 Hz, 1H), 8.85 (d,  $J$  = 8.8 Hz, 1H), 8.51 (d,  $J$  = 8.7 Hz, 1H), 7.85 (d,  $J$  = 2.4 Hz, 1H), 7.67 (d,  $J$  = 4.5 Hz, 1H), 7.61 (d,  $J$  = 8.9 Hz, 1H), 7.23 (d,  $J$  = 3.9 Hz, 1H), 2.84 (s, 3H);  $^{13}\text{C}$  NMR (100 MHz,  $\text{CDCl}_3$ )  $\delta$  160.1, 158.5, 139.9, 139.2, 138.8, 137.1, 133.4, 132.0, 129.3, 128.2, 126.8, 125.7, 120.0, 113.7, 25.2; HRMS (ESI): calculated for  $\text{C}_{15}\text{H}_{11}\text{N}_3\text{O}_3\text{S}$ :  $[\text{M}+\text{H}]^+$  requires 314.0594; found 314.0596.

## References

1. Zhu, X.; Qiao, L.; Ye, P.; Ying, B.; Xu, J.; Shen, C.; Zhang, P. Copper-catalyzed rapid C–H nitration of 8-aminoquinolines by using sodium nitrite as the nitro source under mild conditions. *RSC Adv.* **2016**, *6*, 89979–89983.
2. He, Y.; Zhao, N.-N.; Qiu, L.-Q.; Zhang, X.-Y.; Fan, X.-S. Regio- and chemoselective mono- and bisnitration of 8-aminoquinoline amides with Fe (NO<sub>3</sub>)<sub>3</sub>·9H<sub>2</sub>O as promoter and nitro source. *Organic letters. Org. Lett.* **2016**, *18*, 6054–6057.
3. Whiteoak, C.J.; Planas, O.; Company, A.; Ribas, X. A First Example of Cobalt-Catalyzed Remote C–H Functionalization of 8-Aminoquinolines Operating through a Single Electron Transfer Mechanism. *Adv. Synth. Catal.* **2016**, *358*, 1679–1688.

#### 4. Copies of $^1\text{H}$ and $^{13}\text{C}$ NMR Spectra of the Products

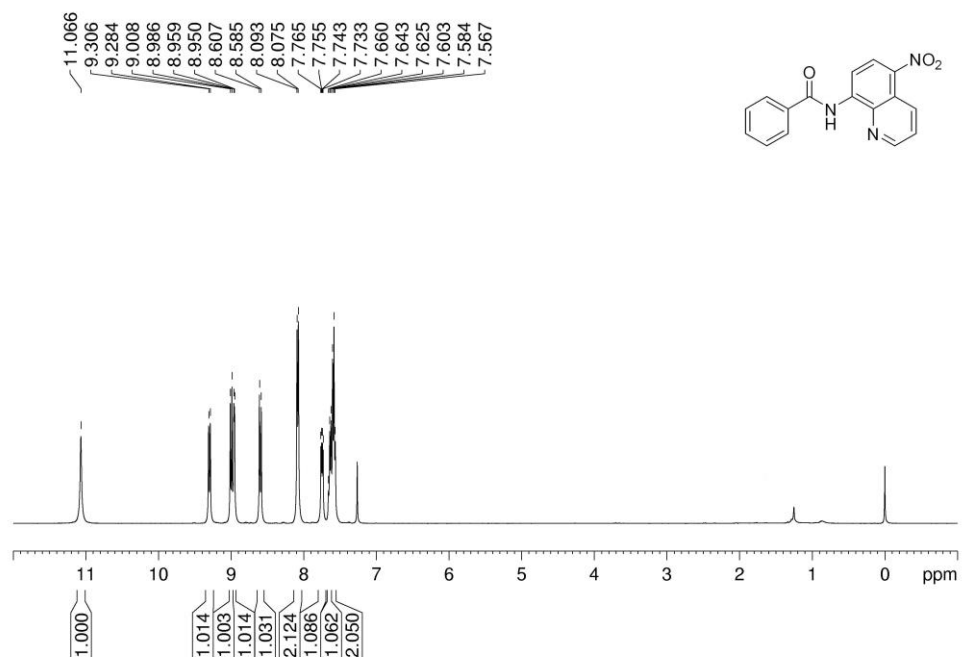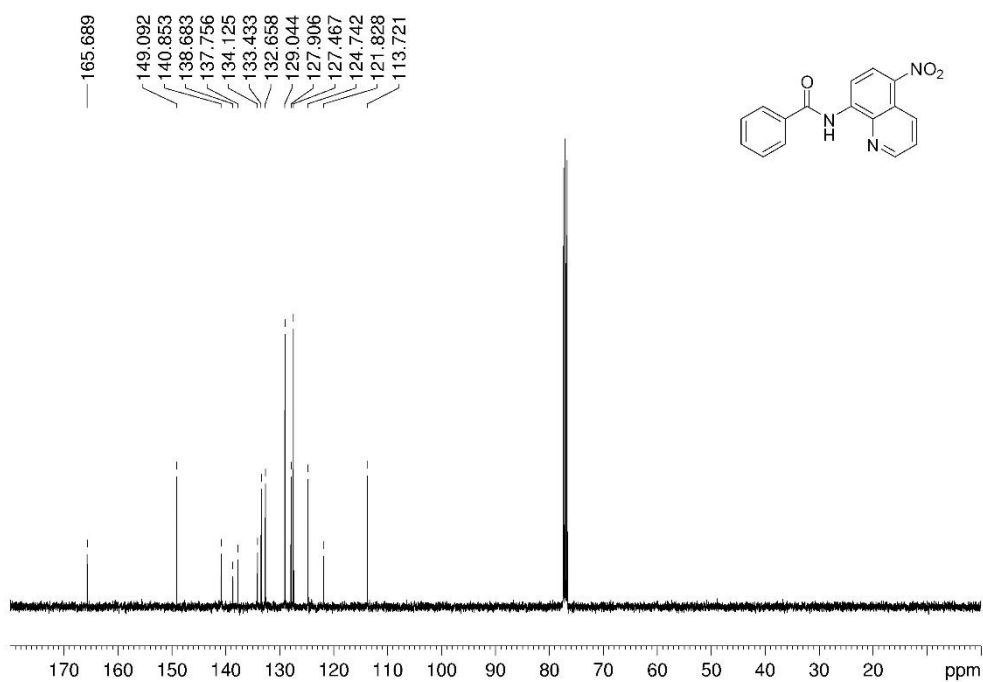



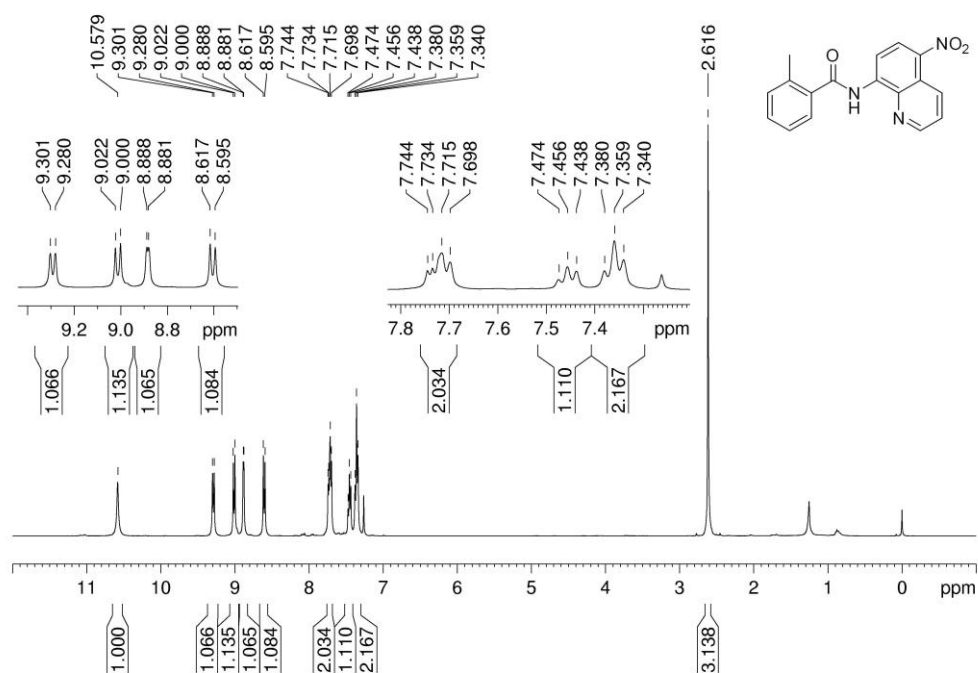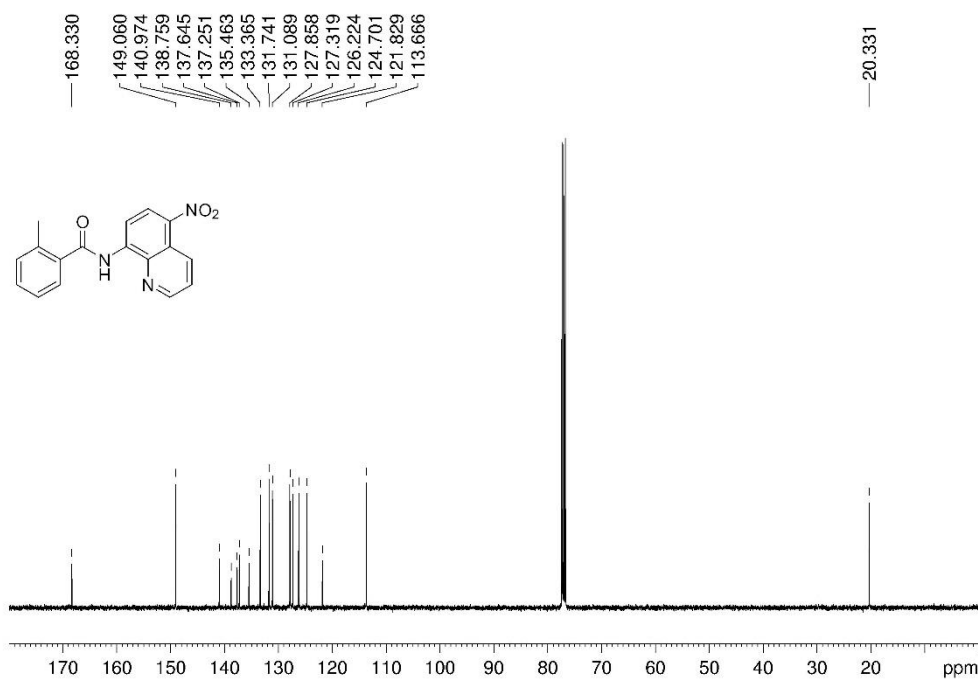

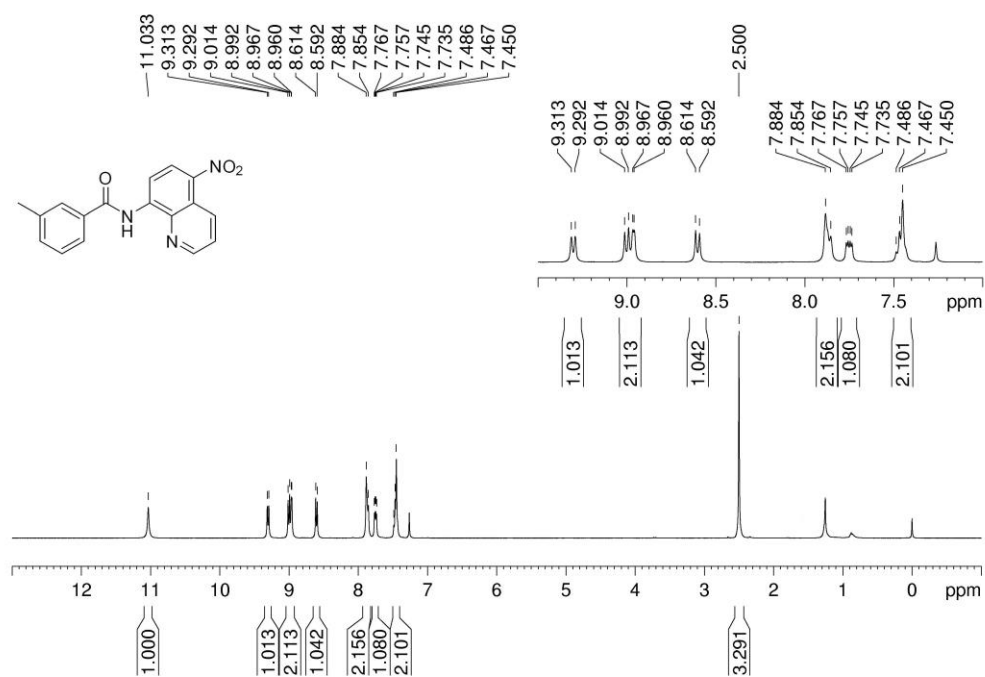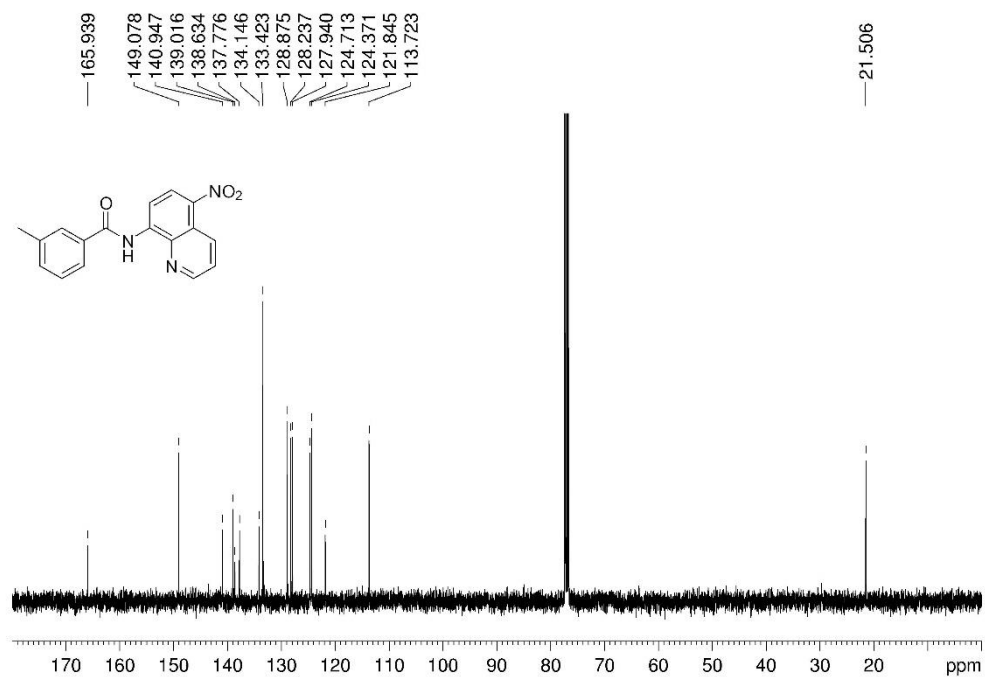

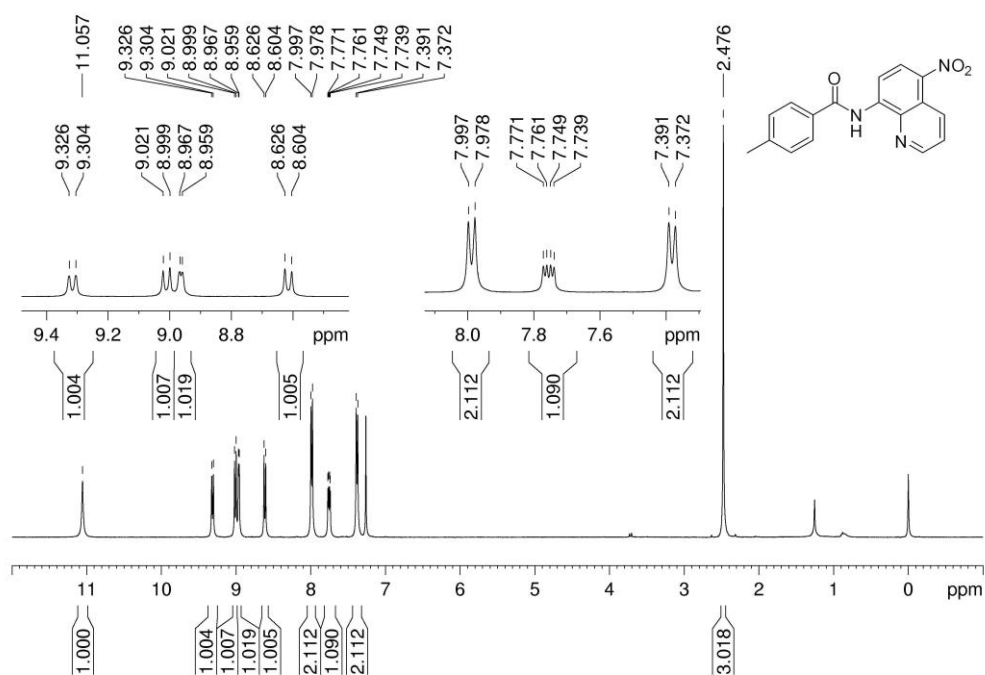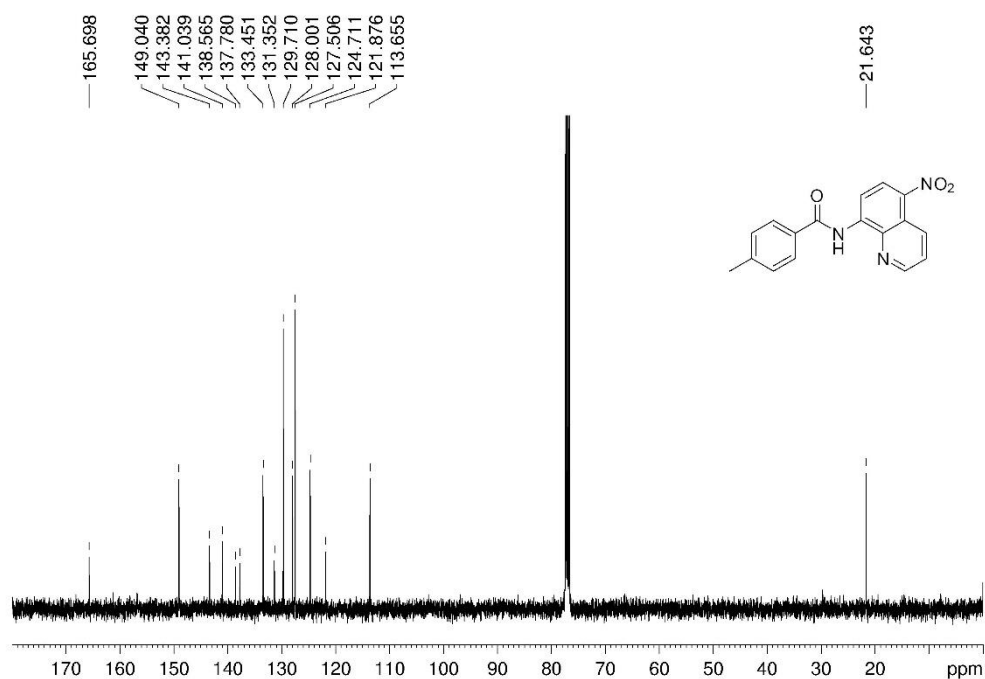

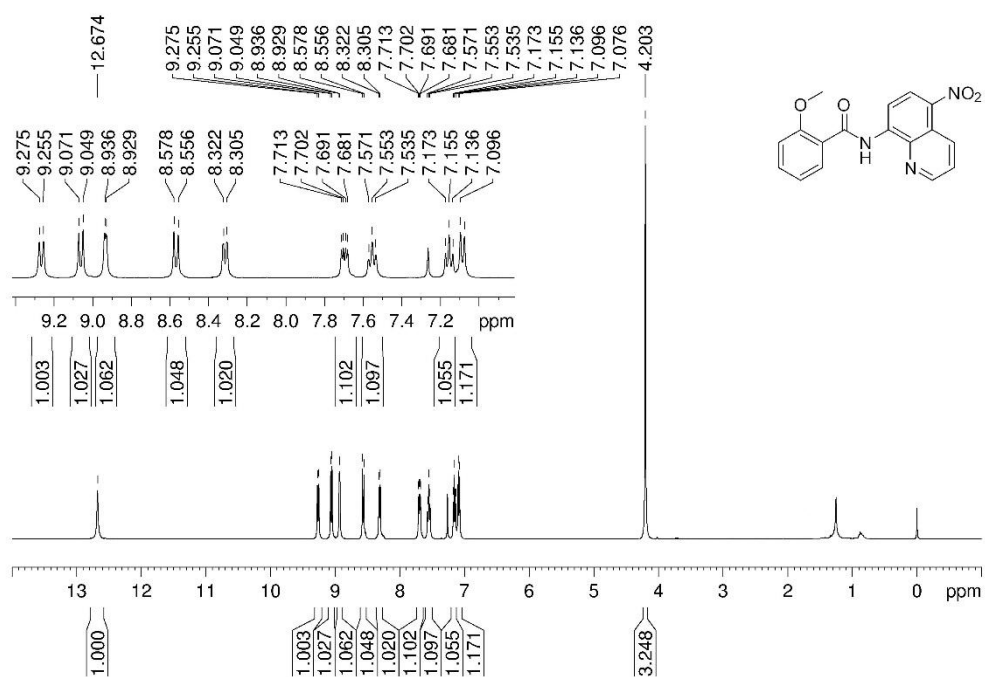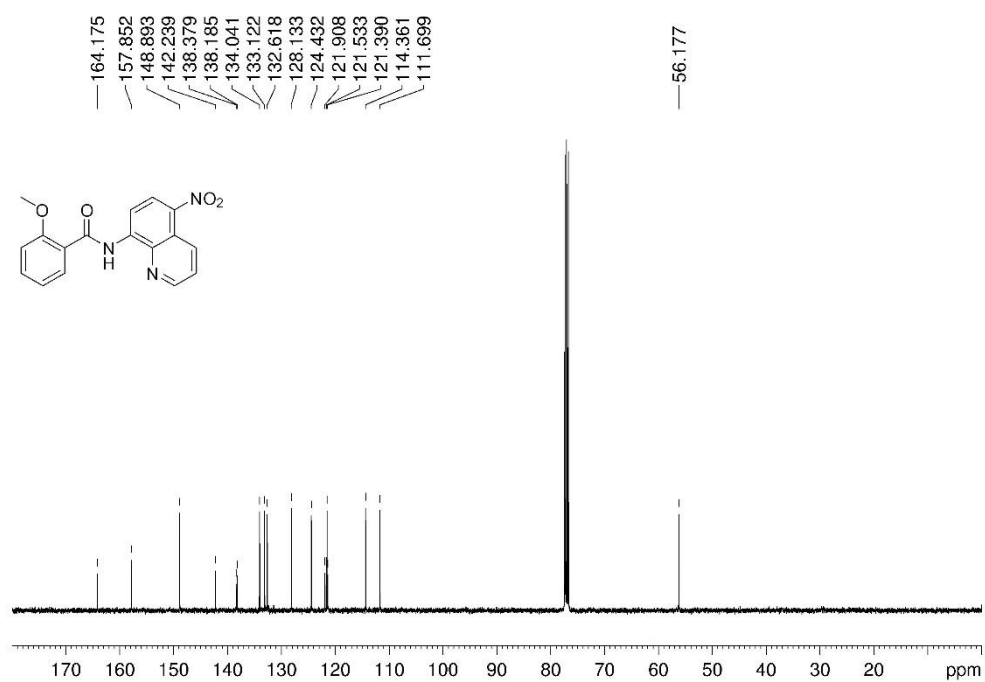

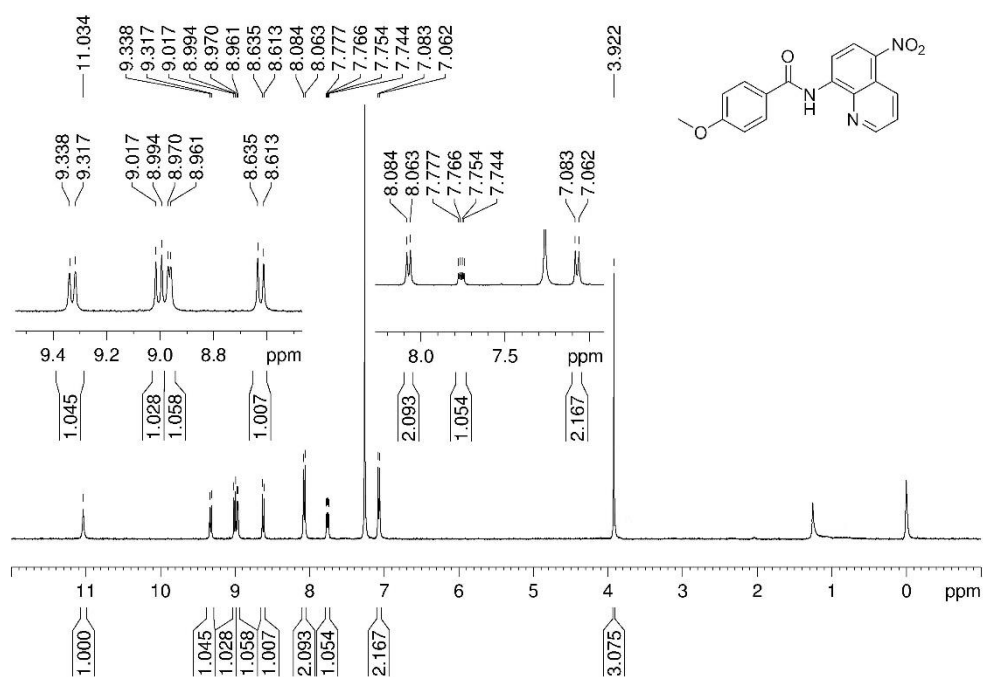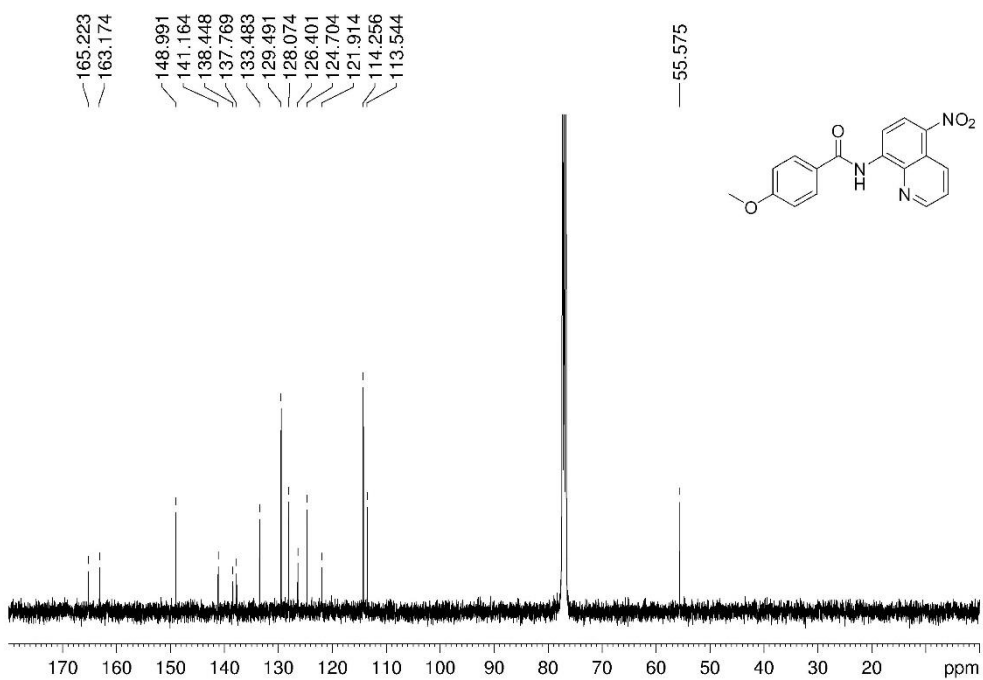

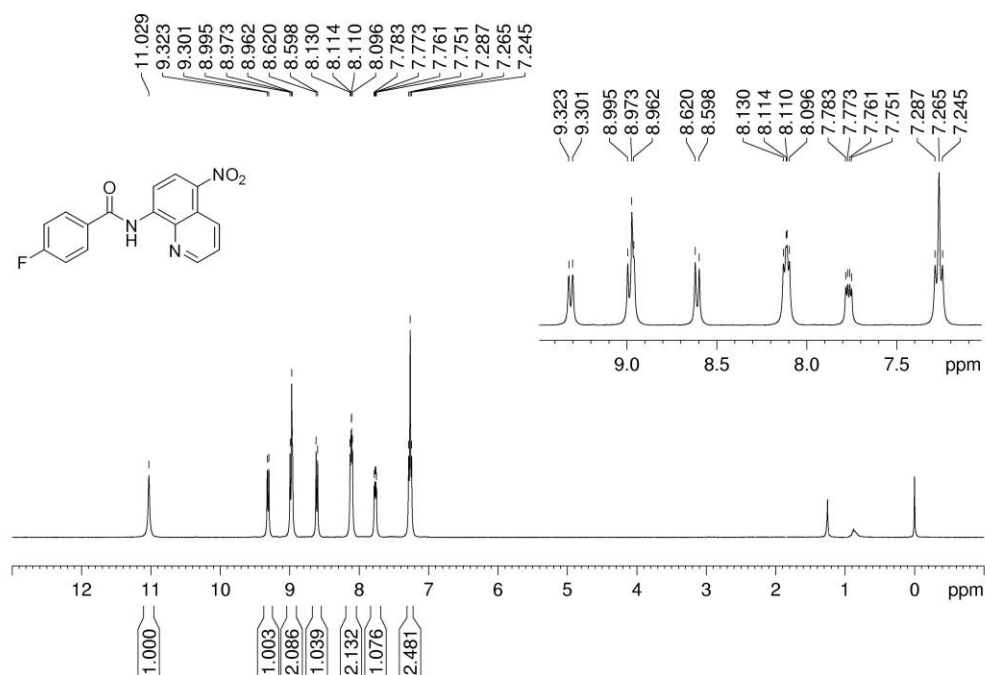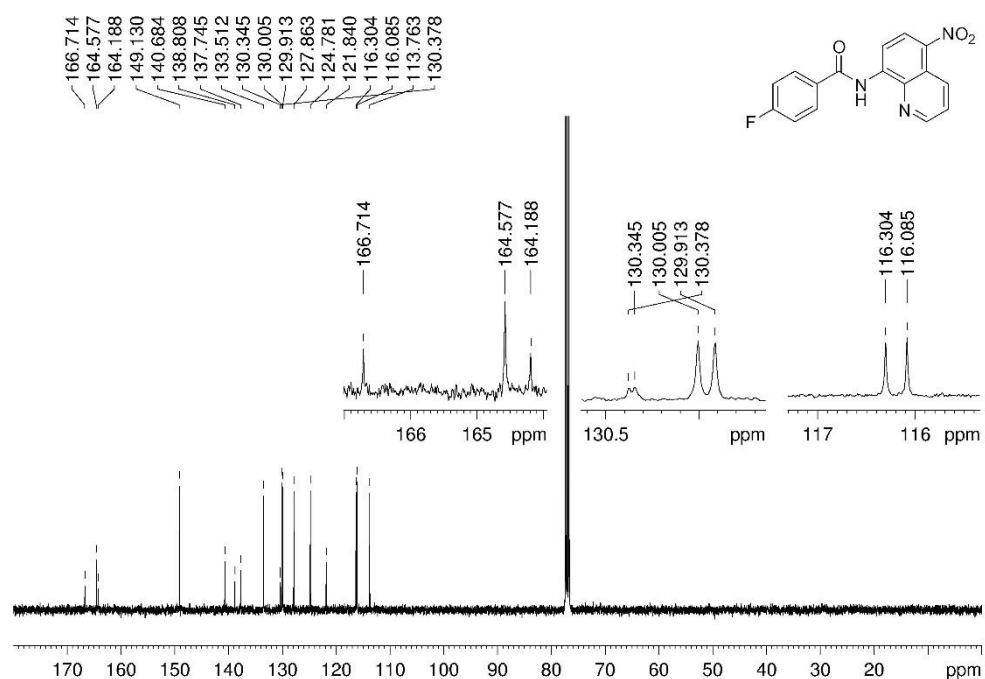

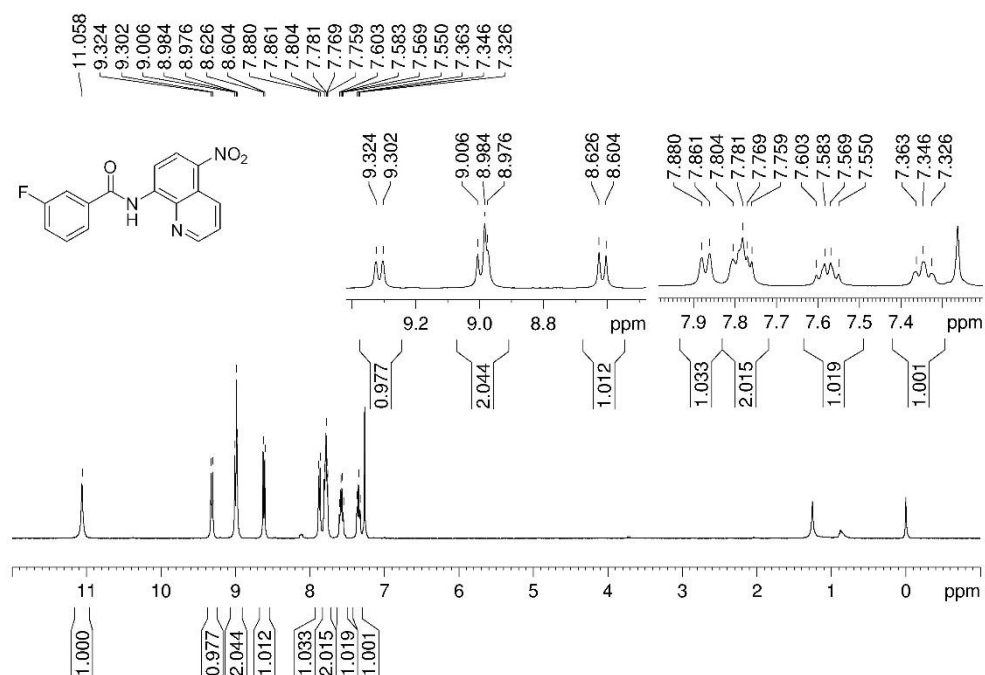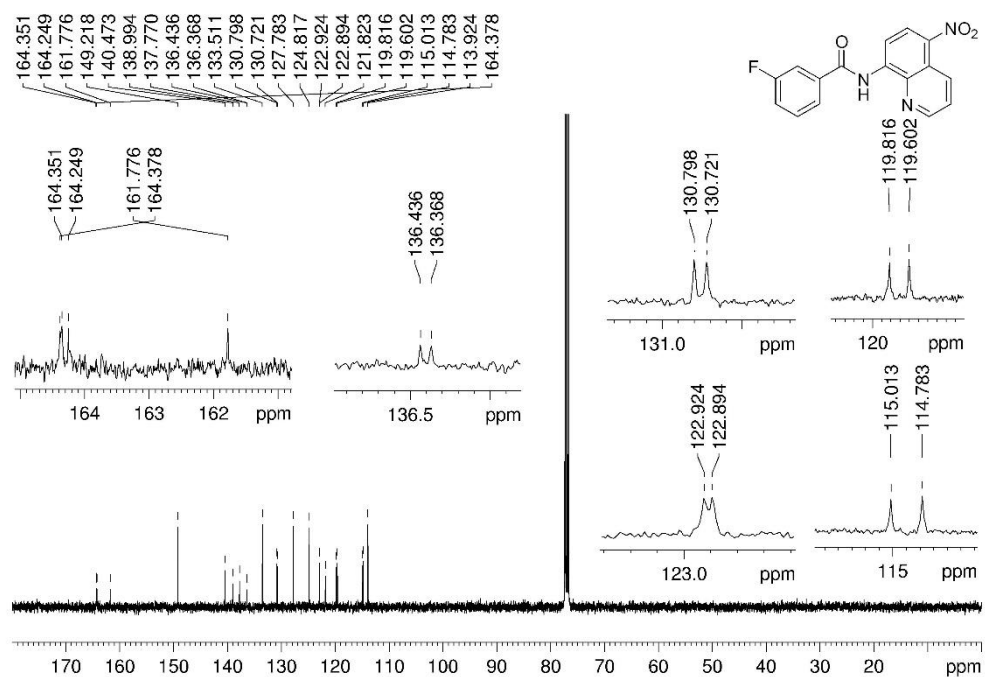

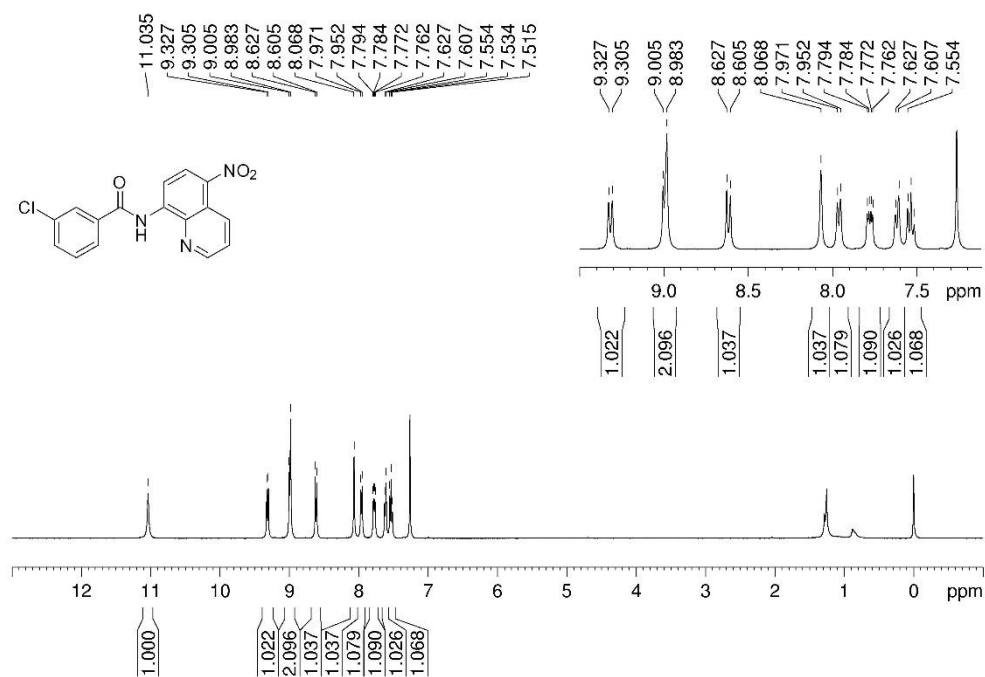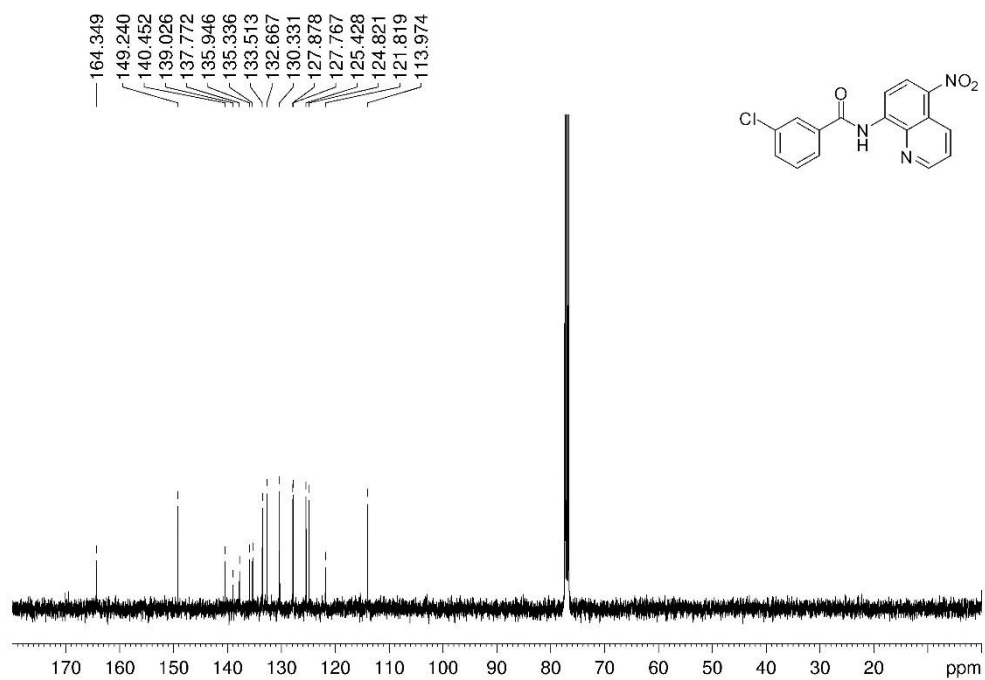



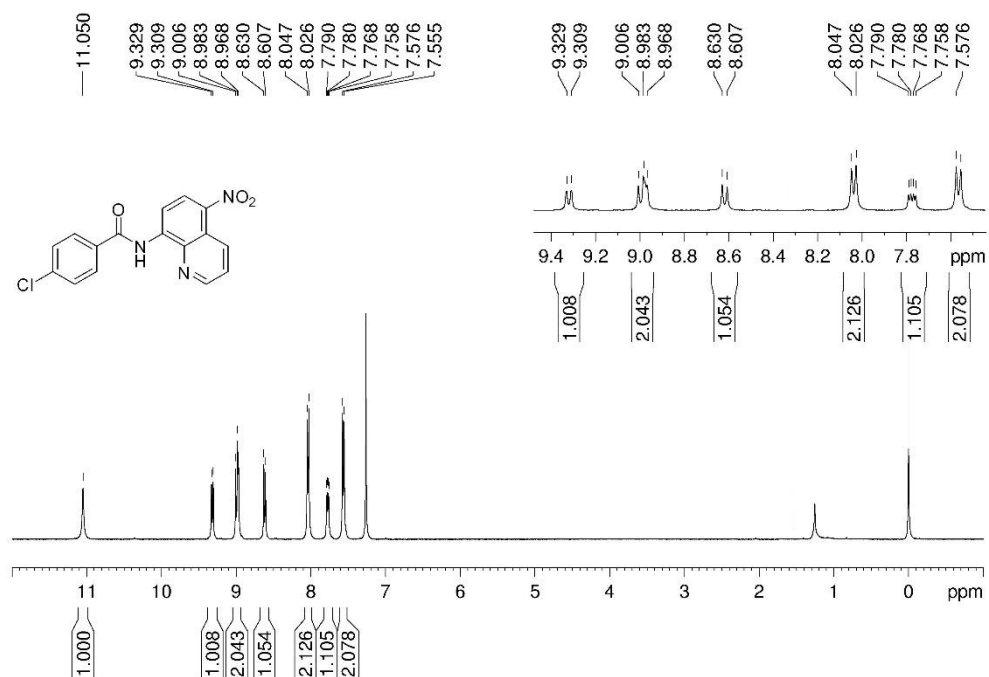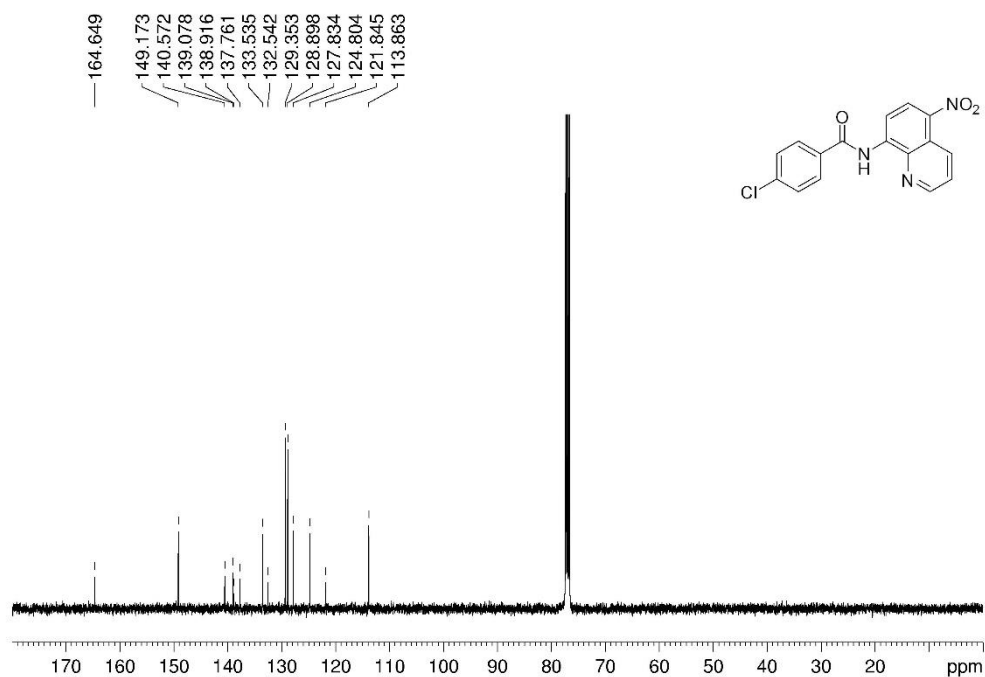

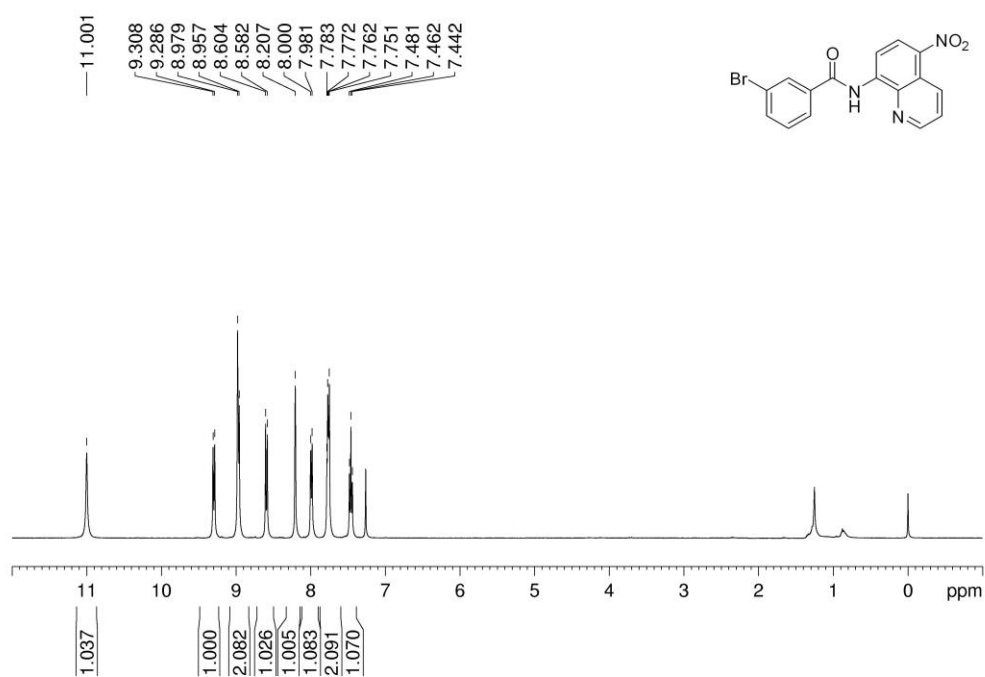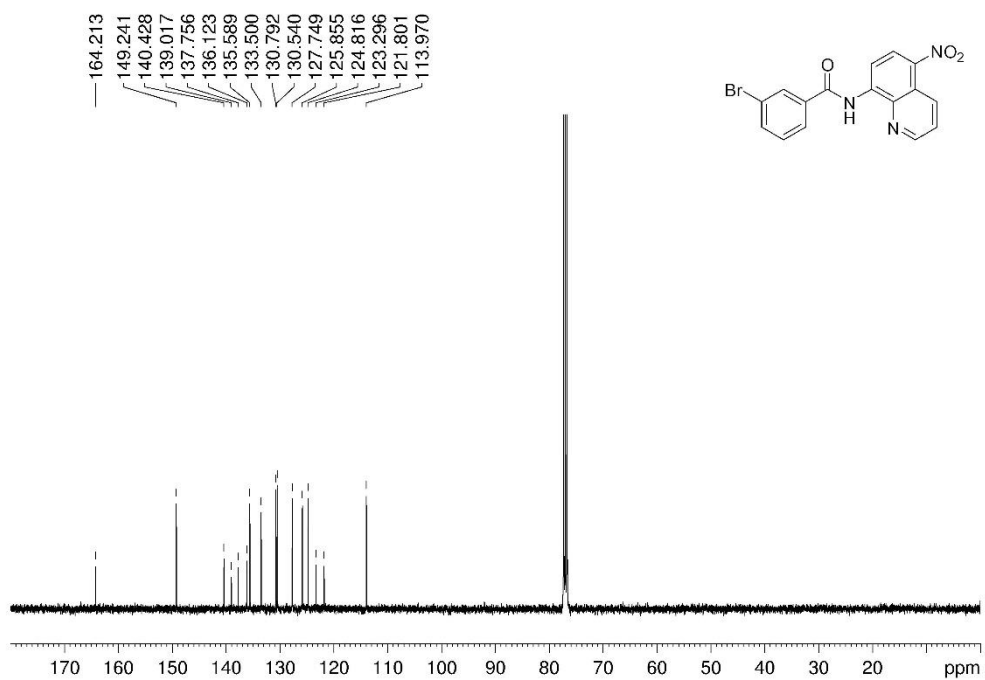

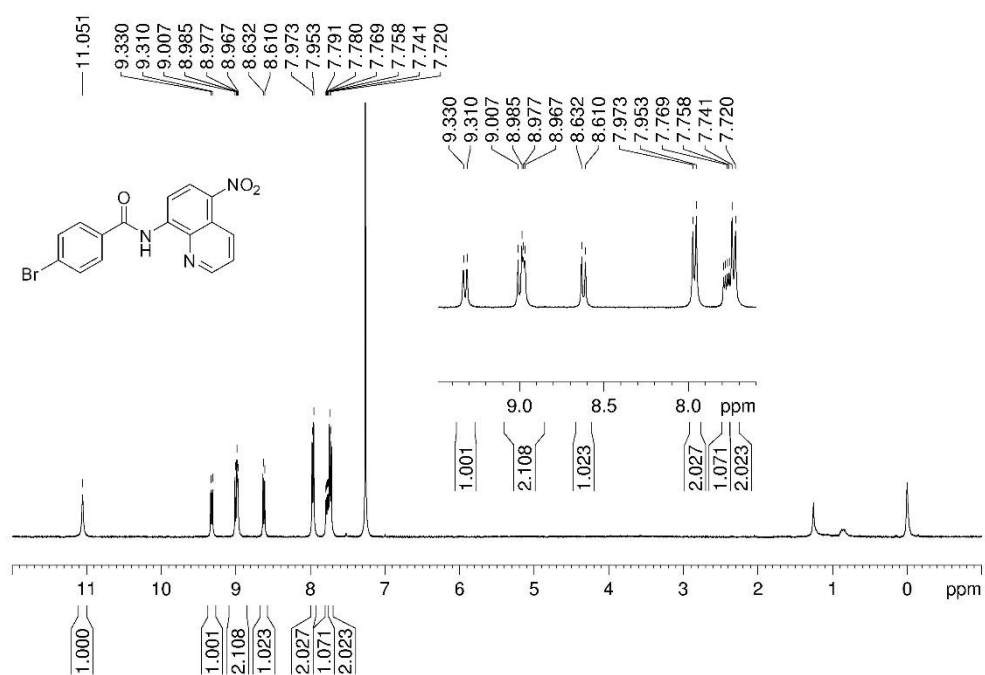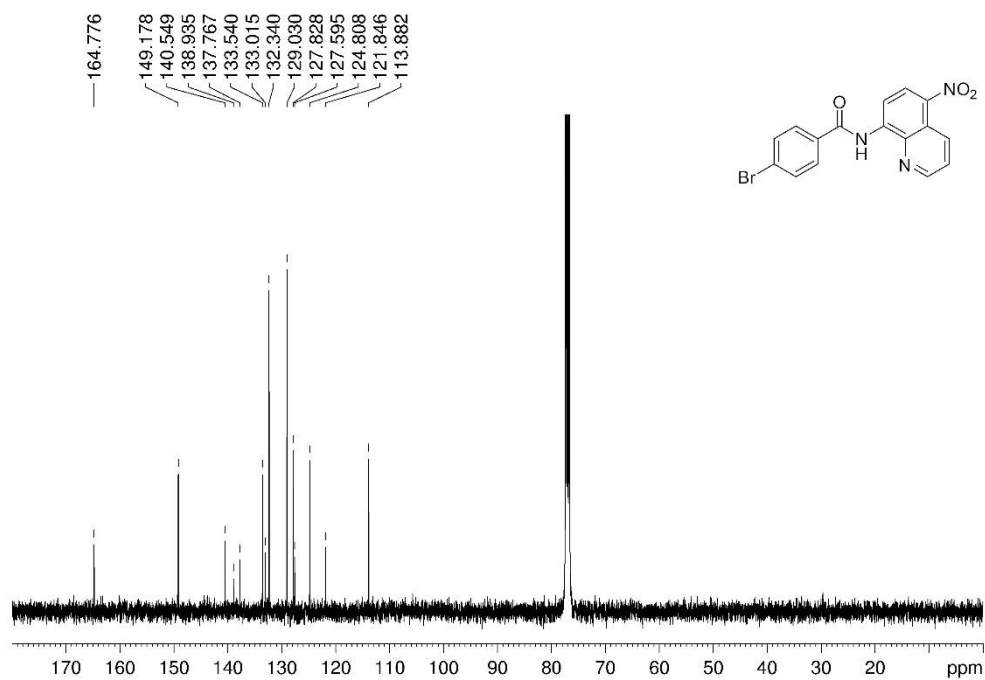

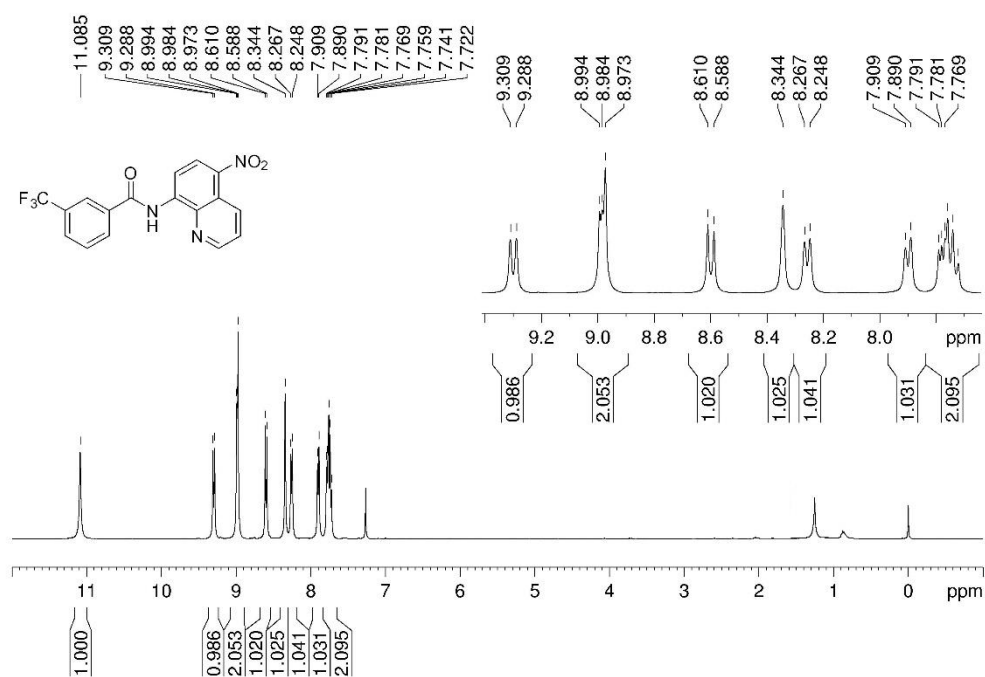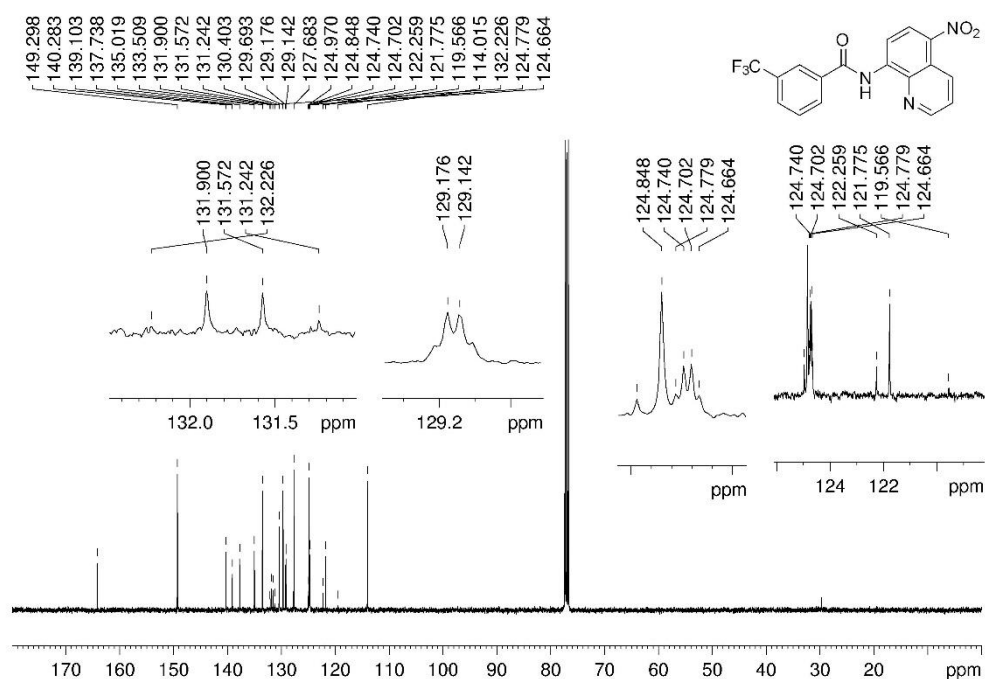

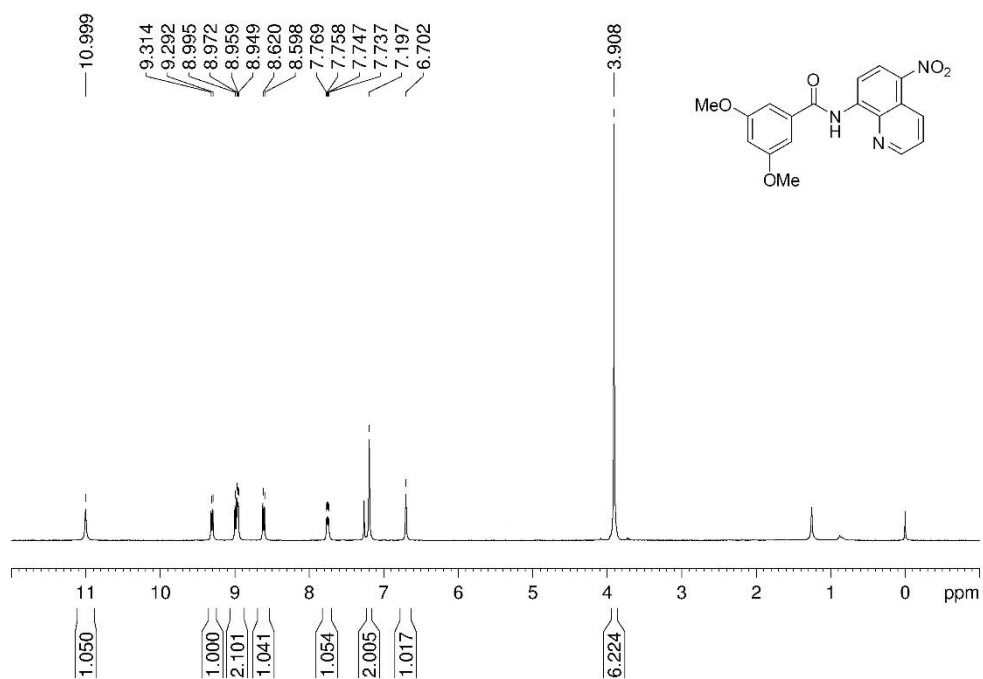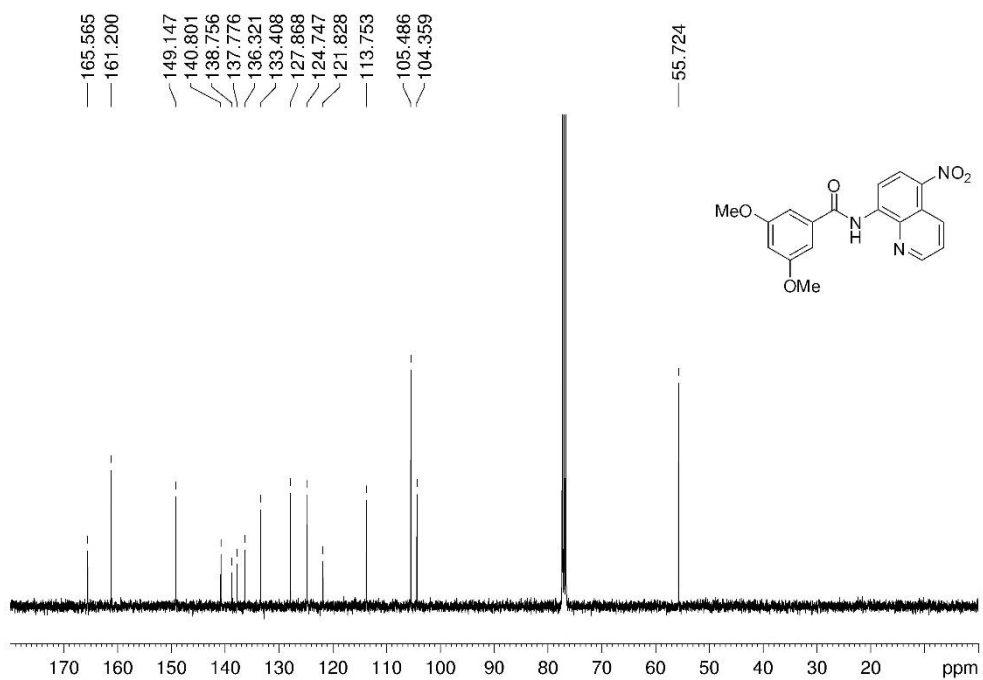

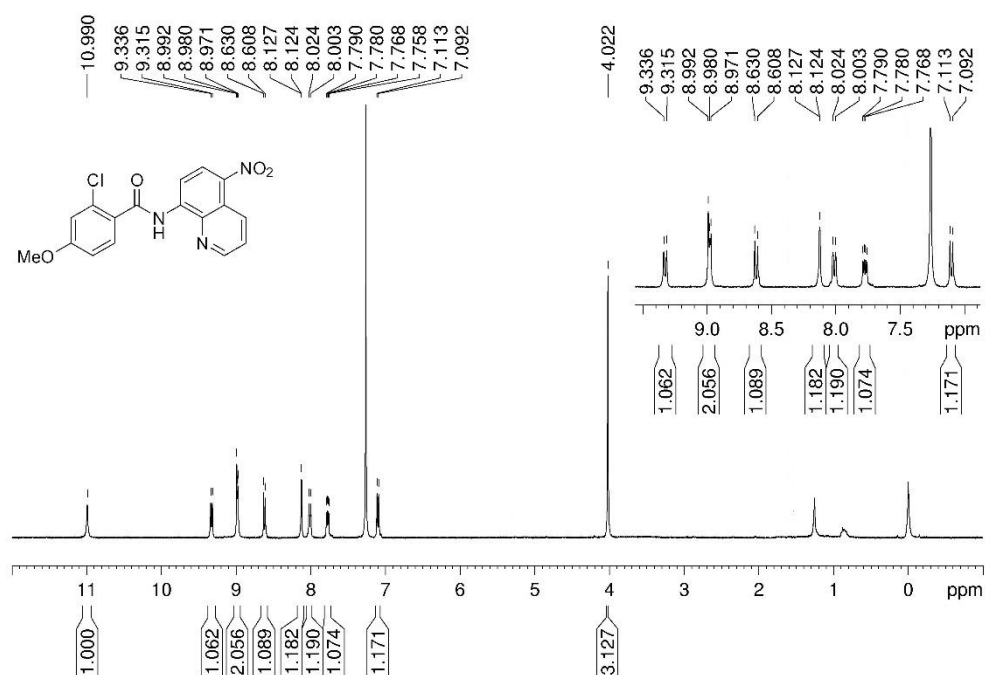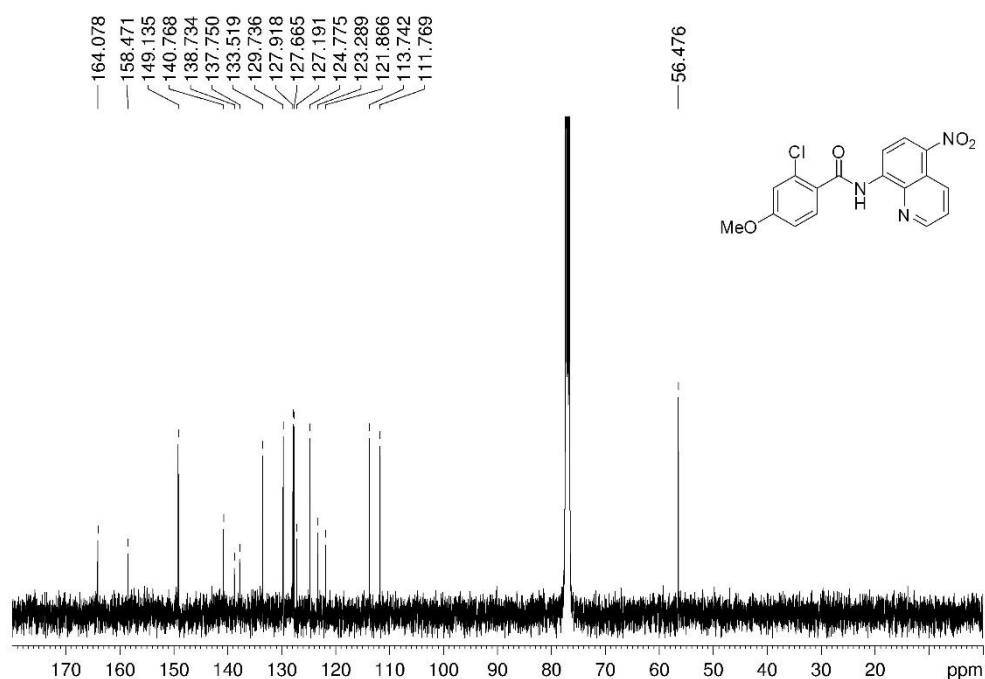

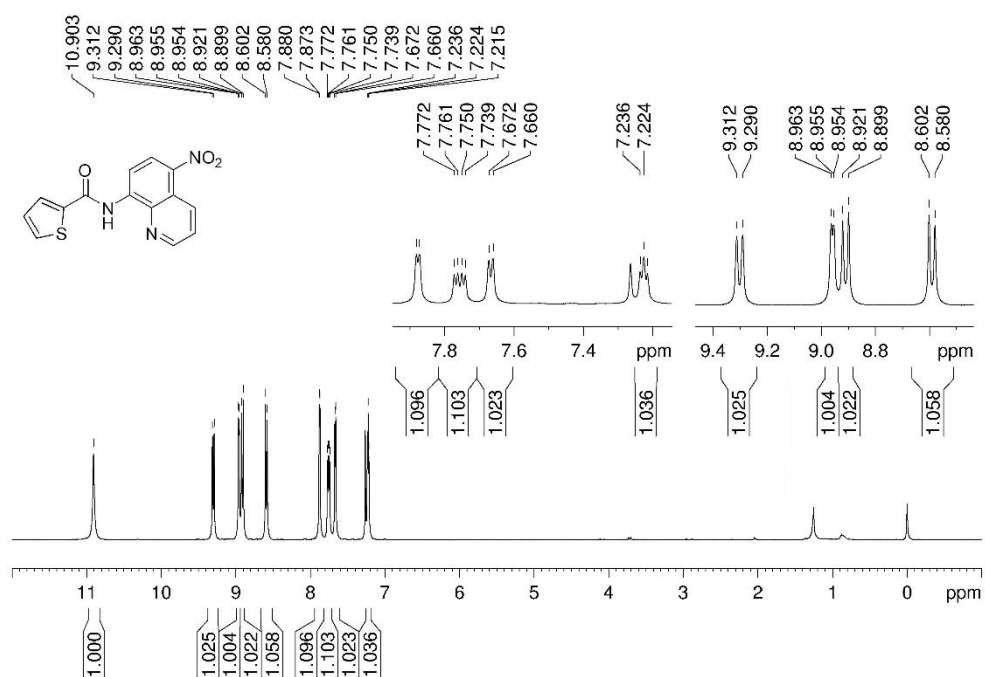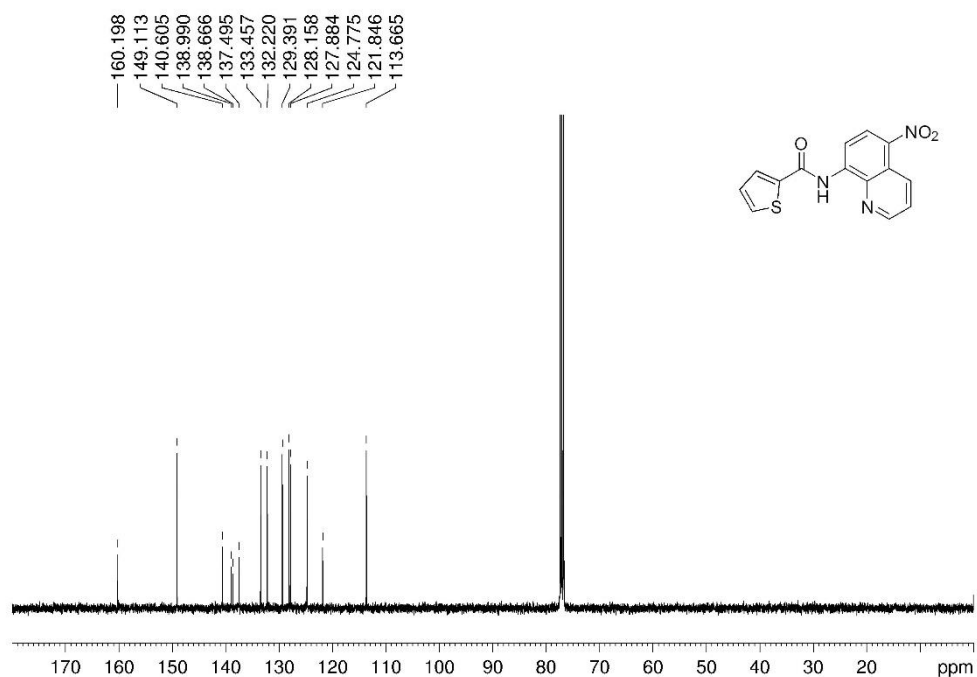

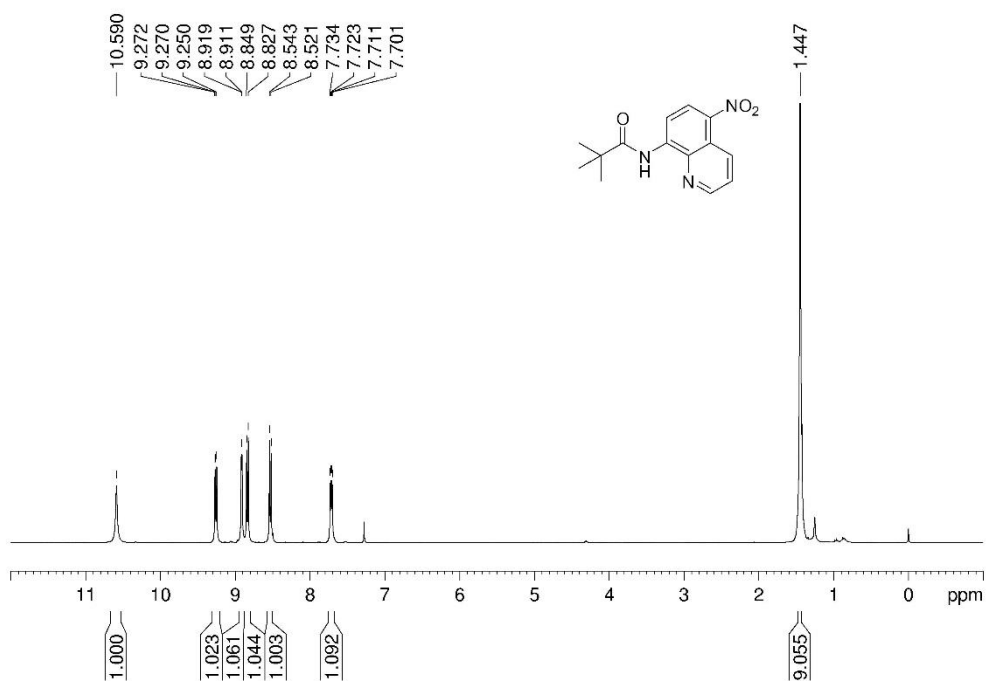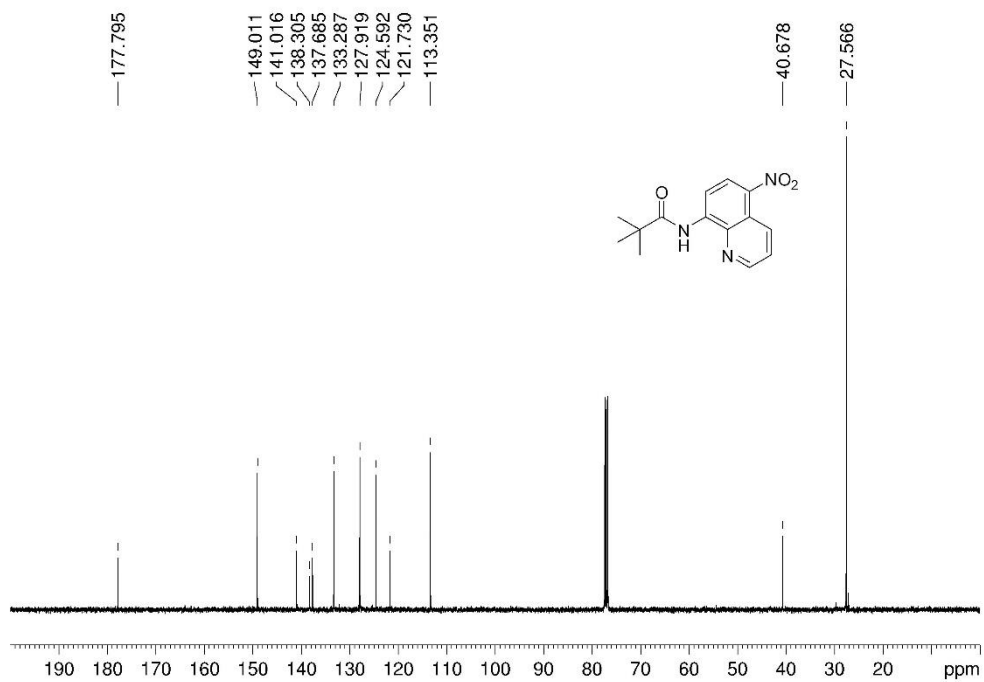



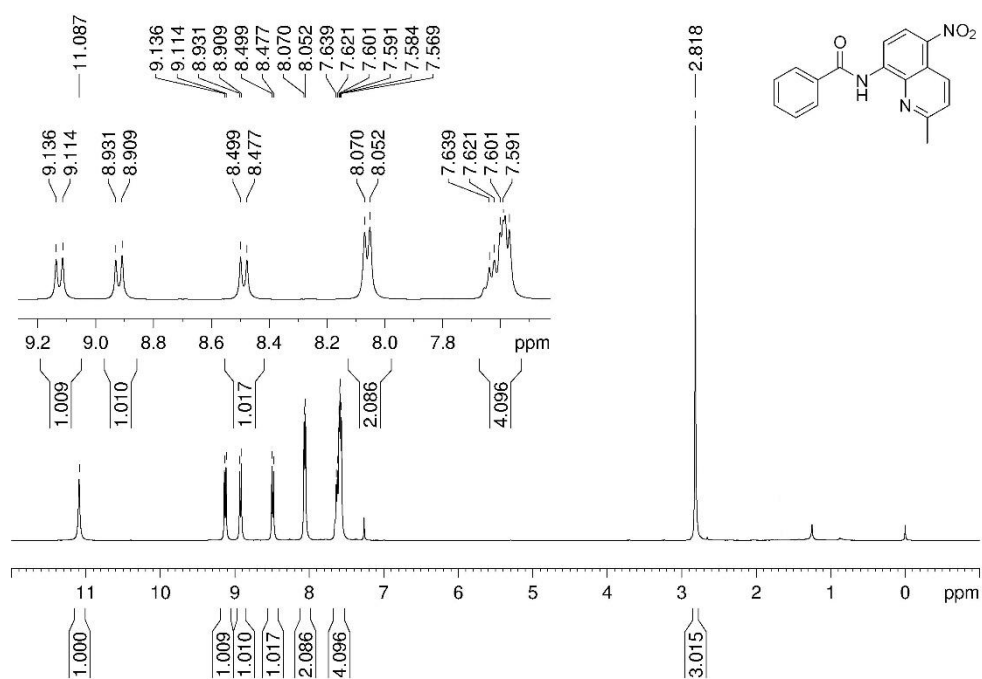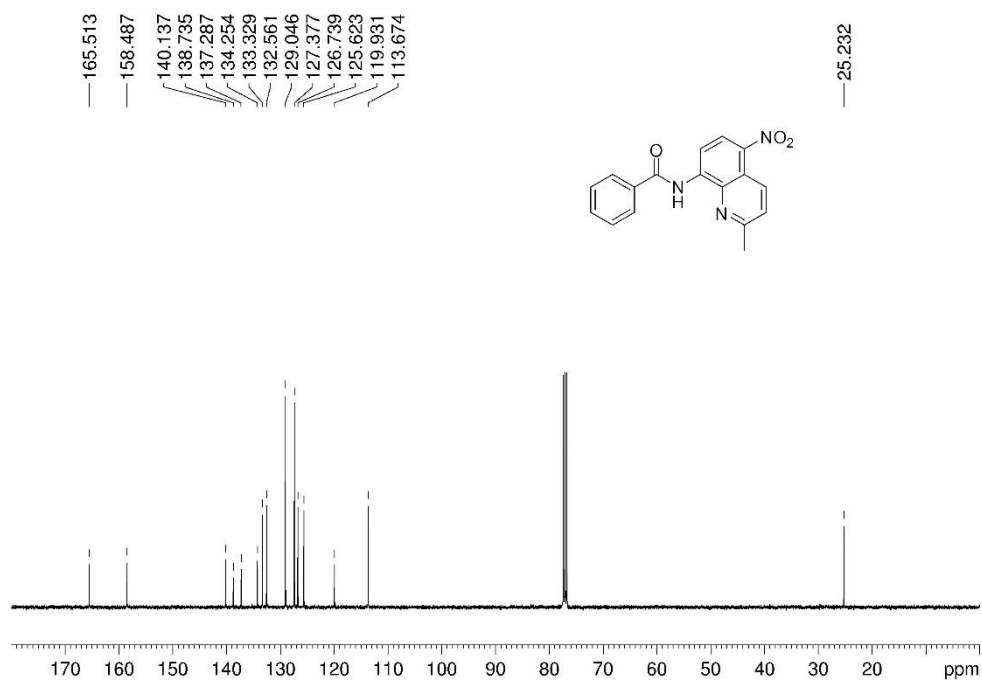

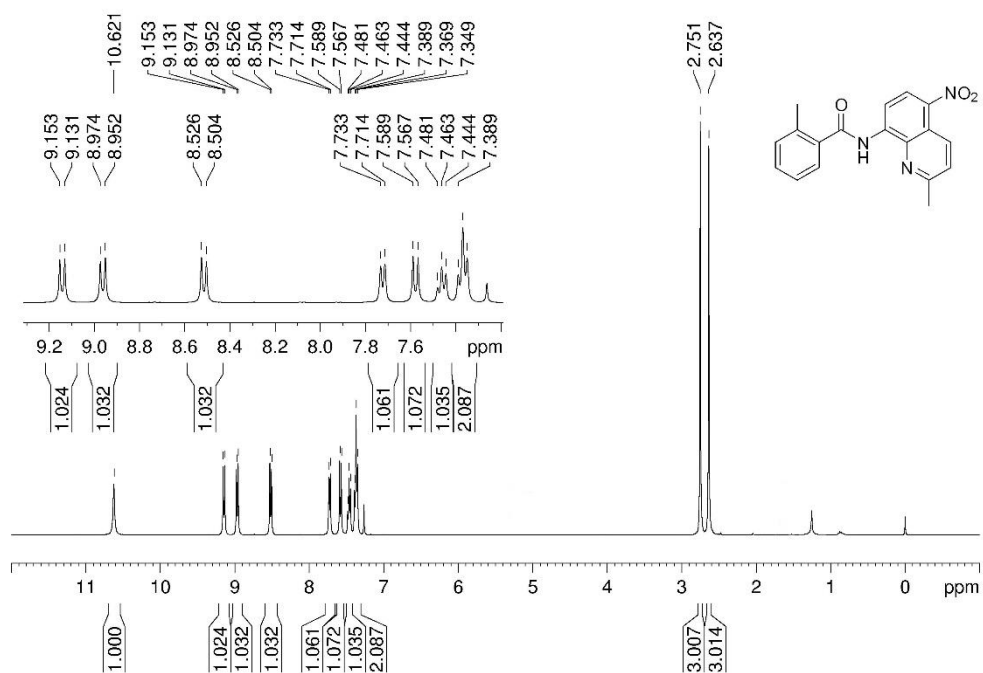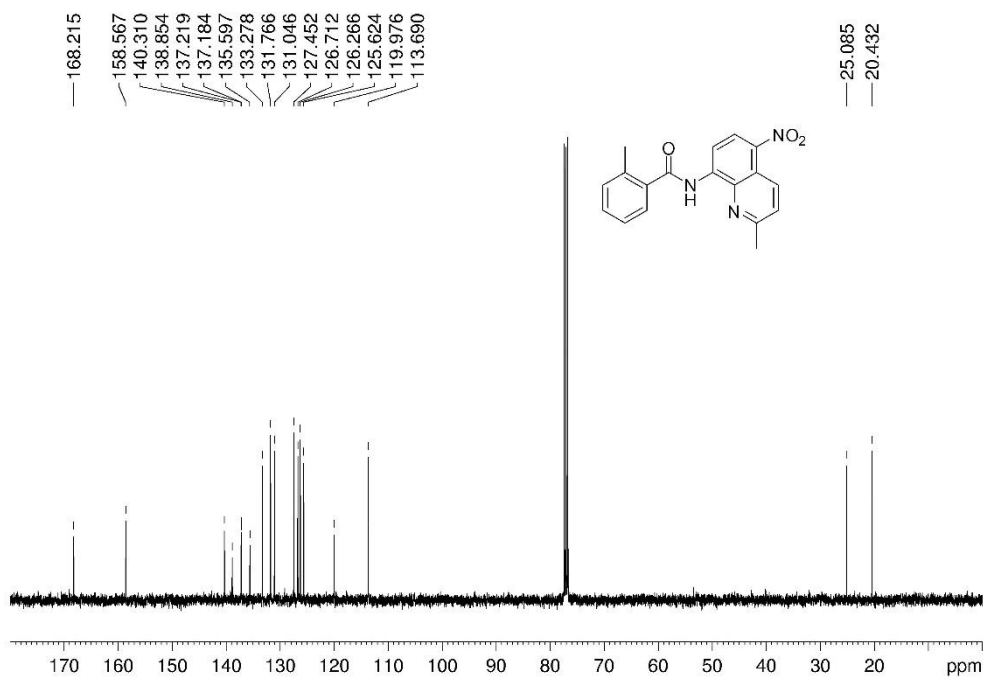

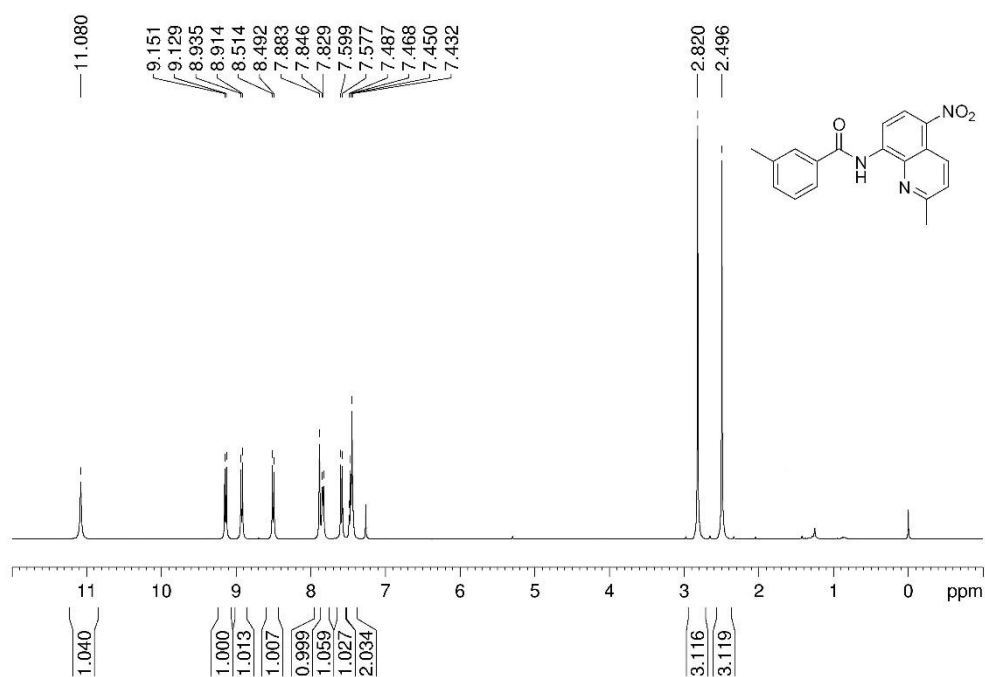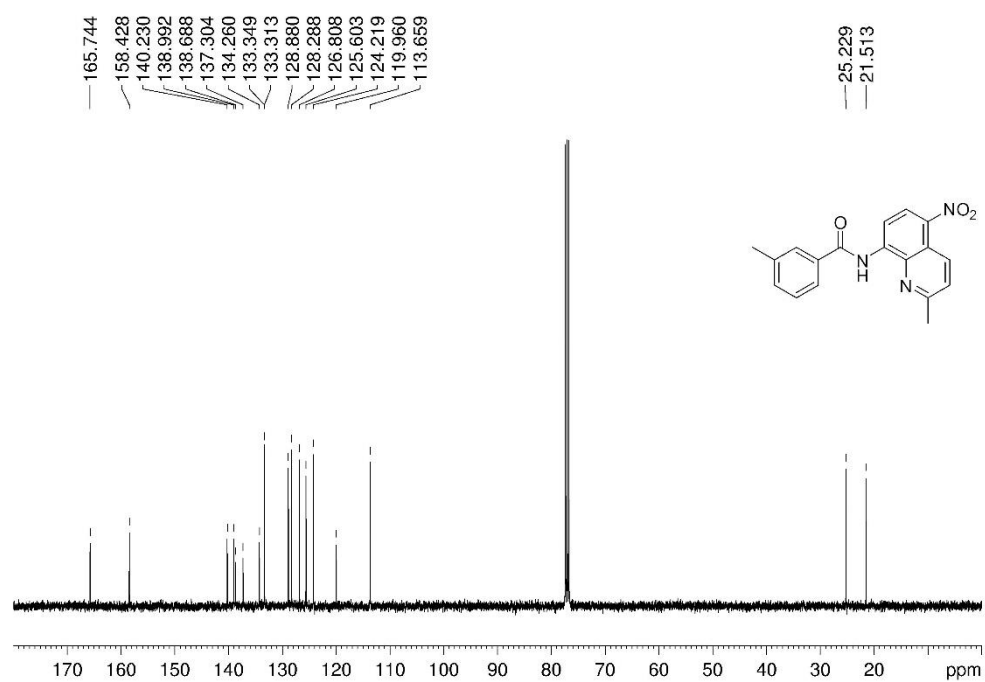

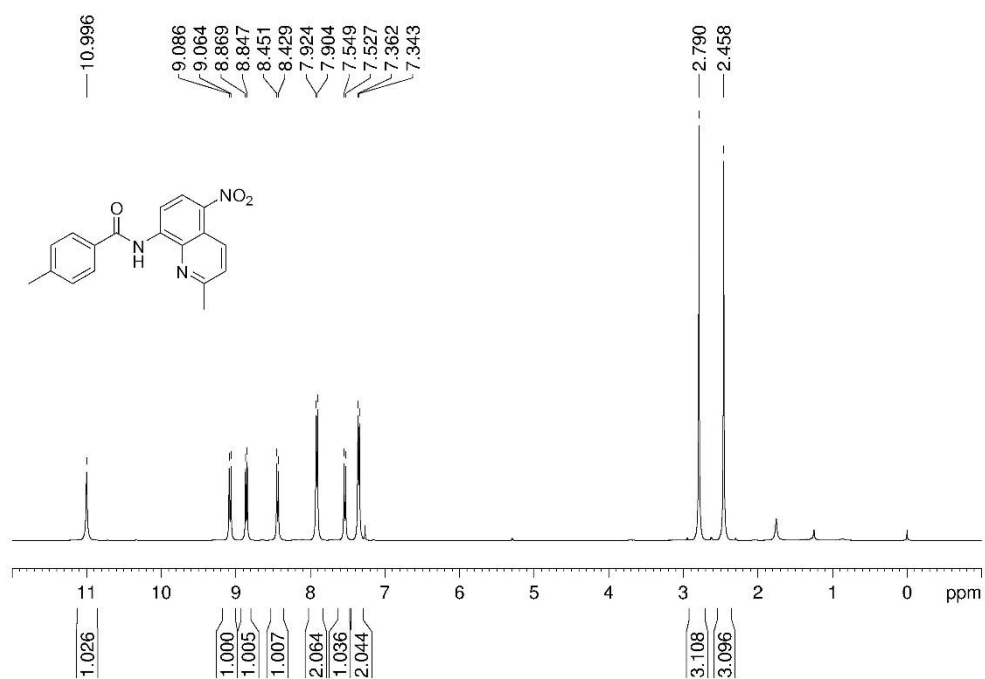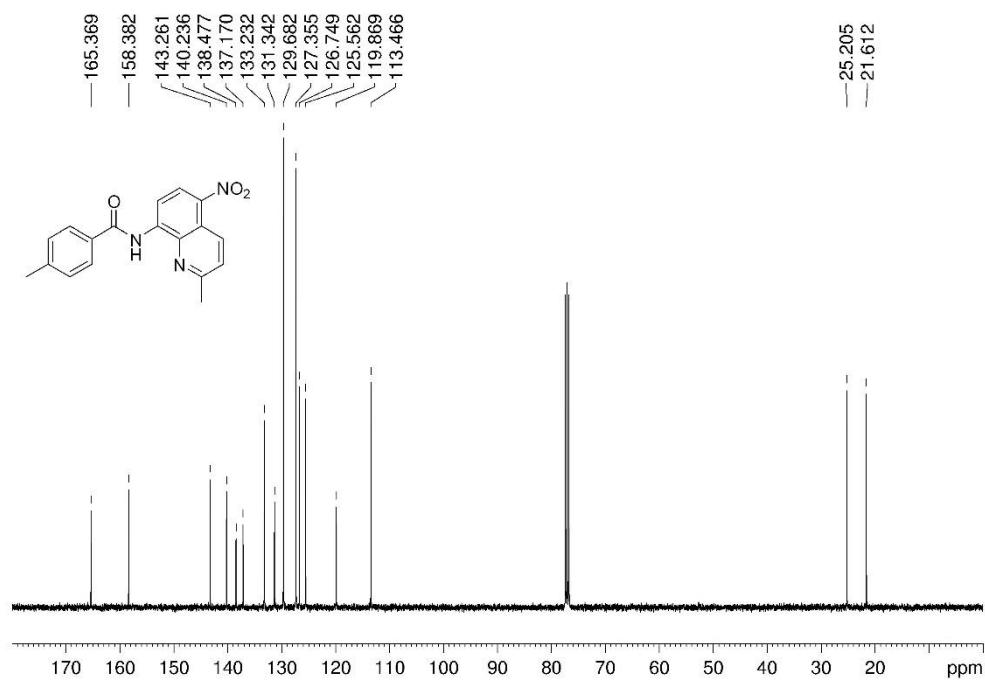

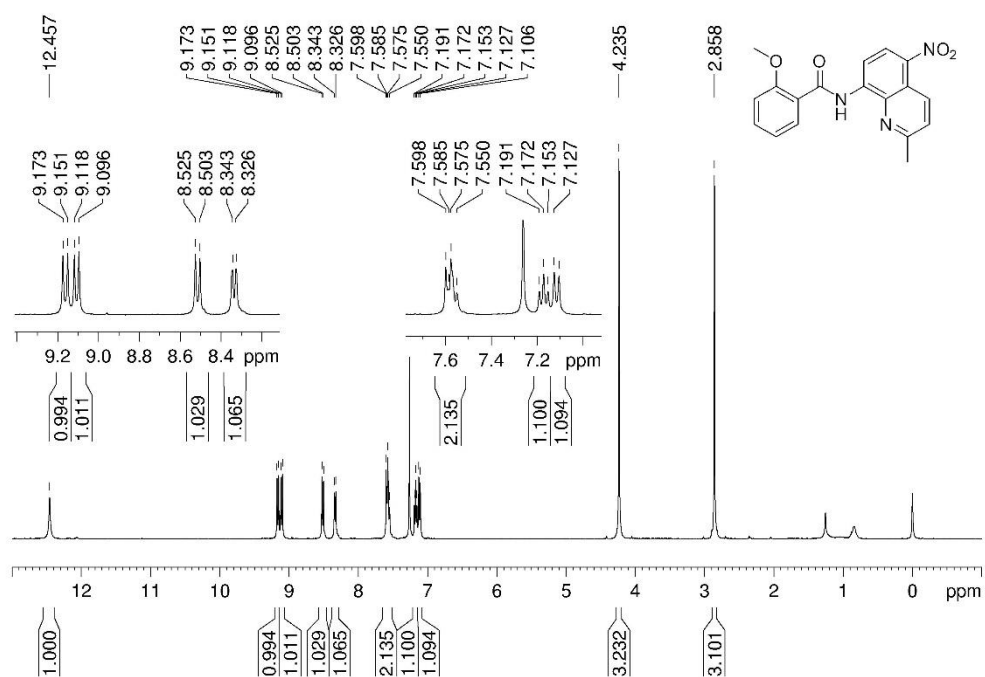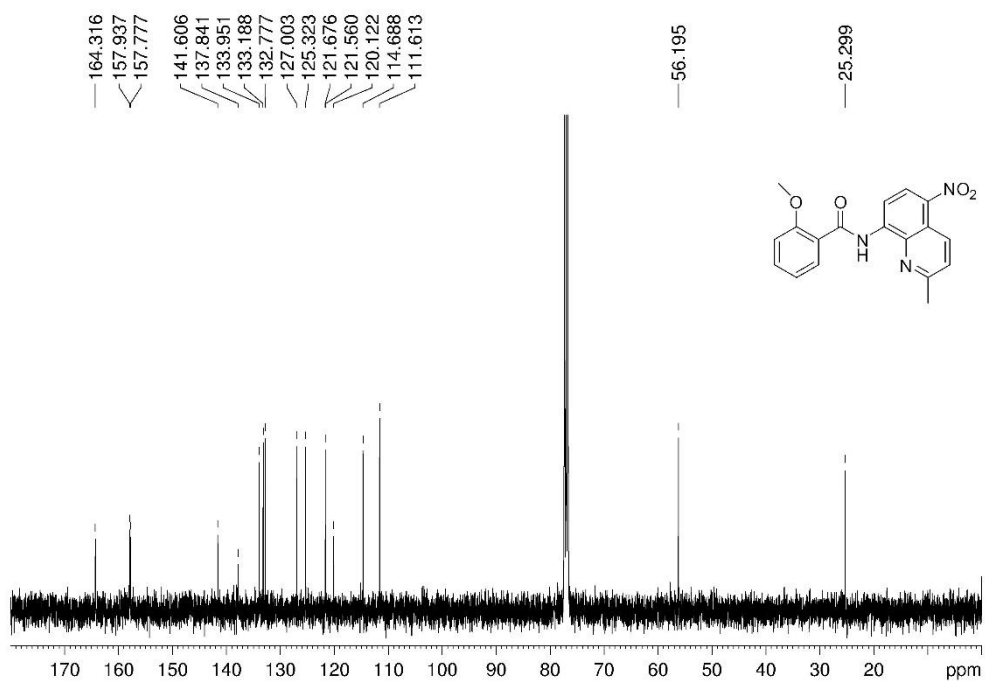

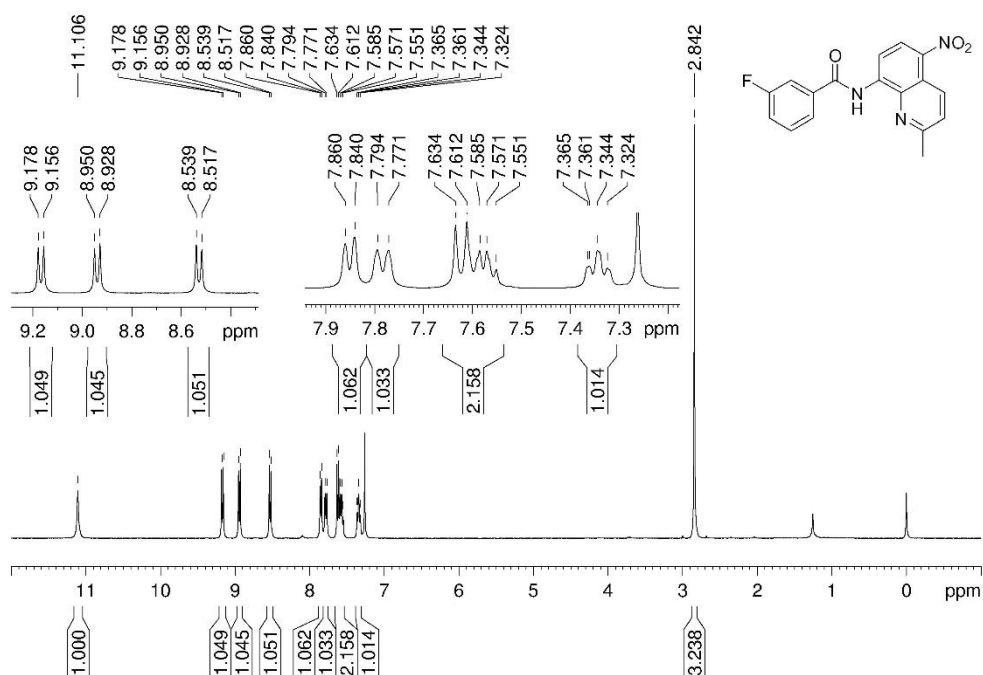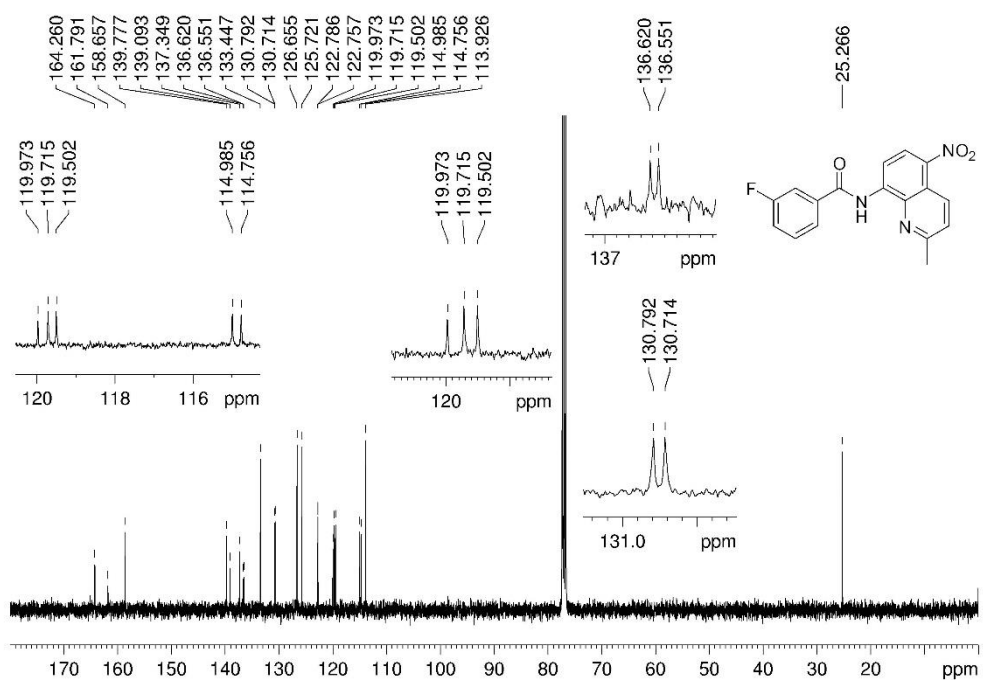

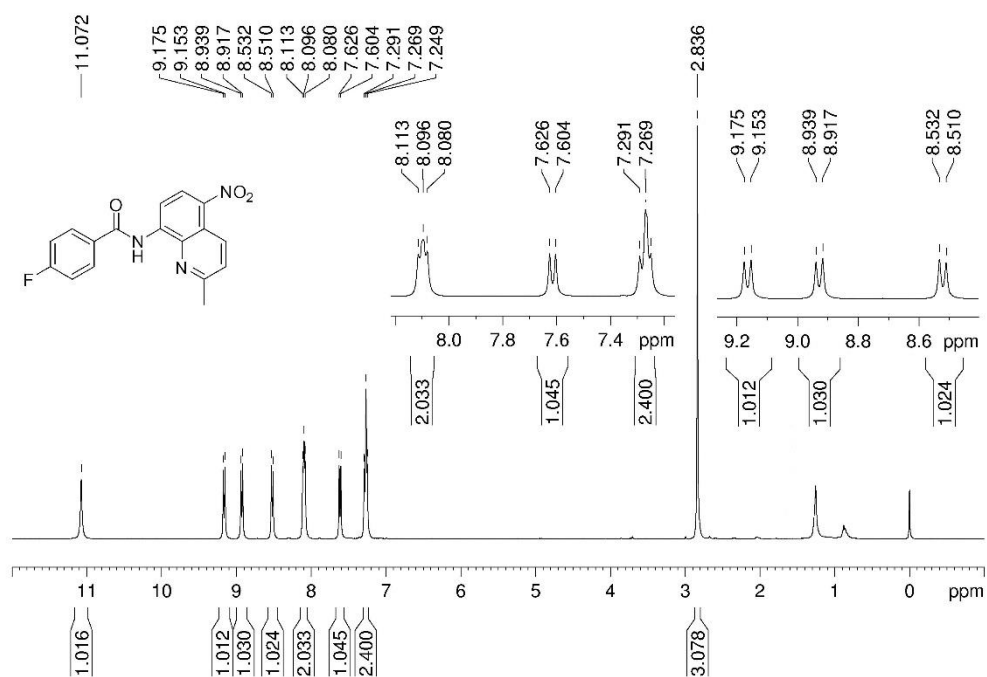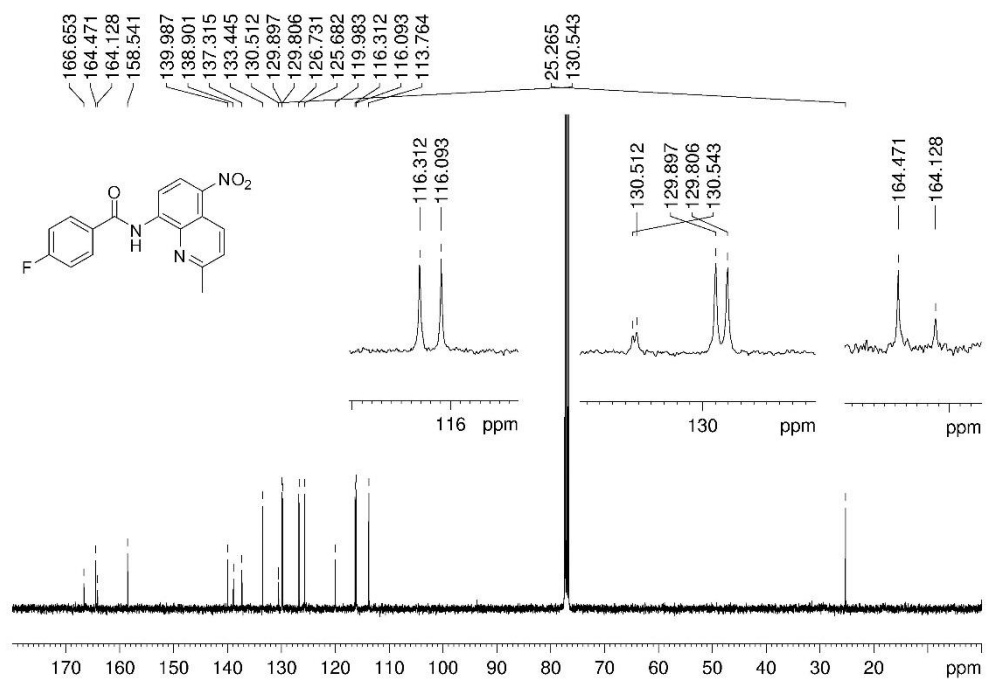

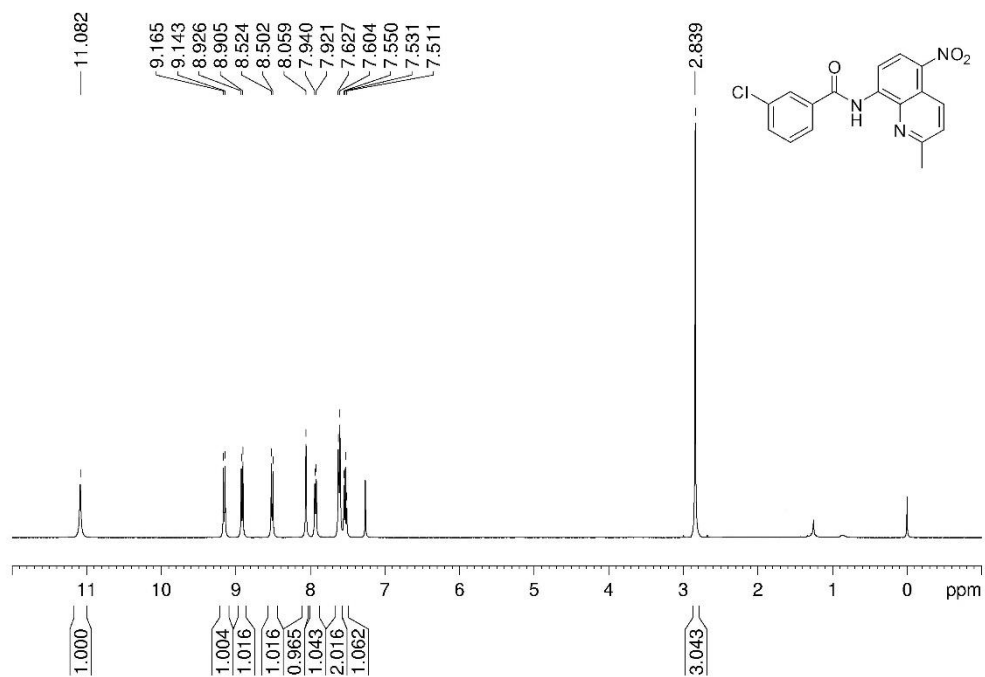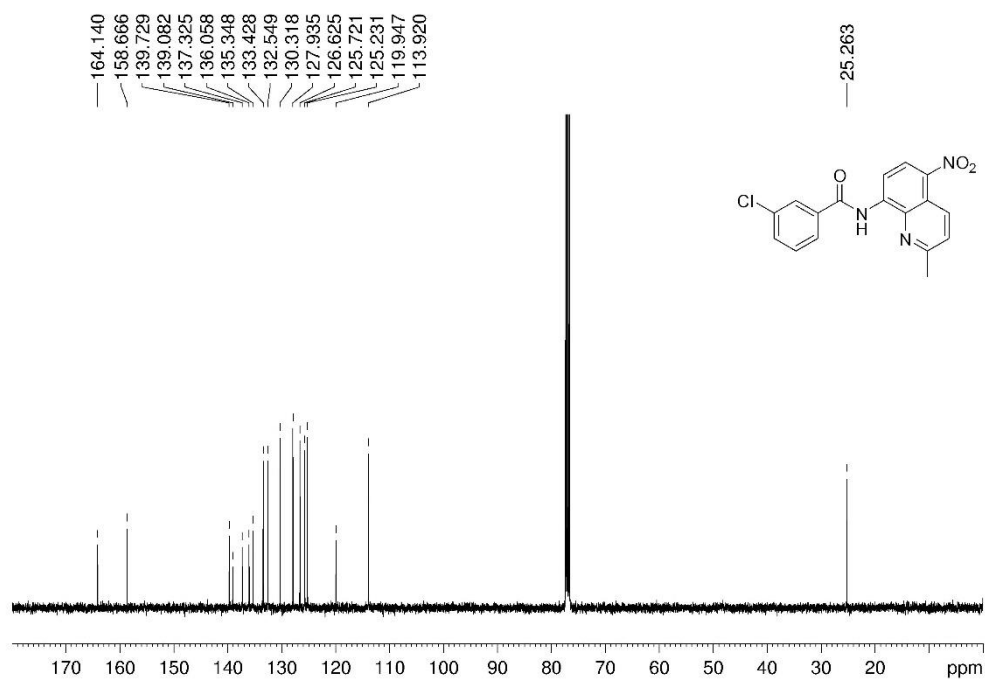



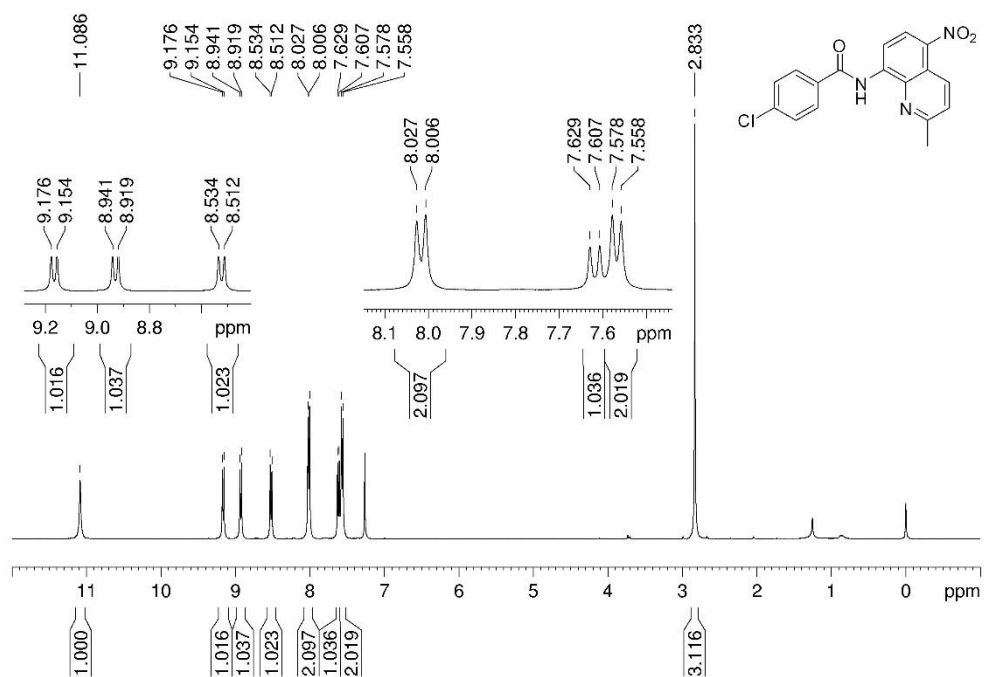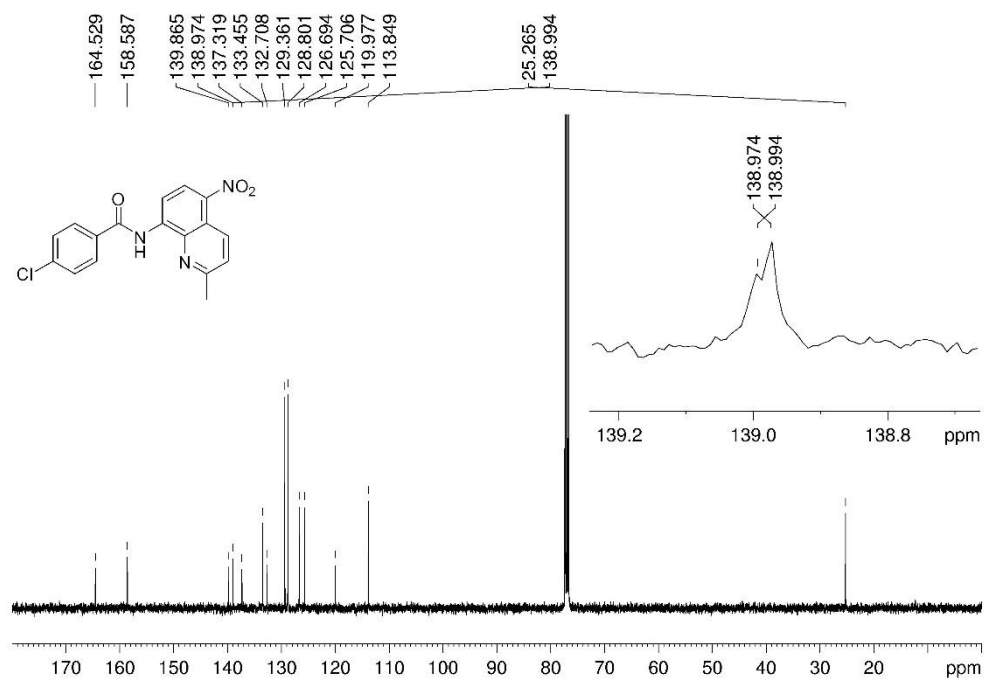

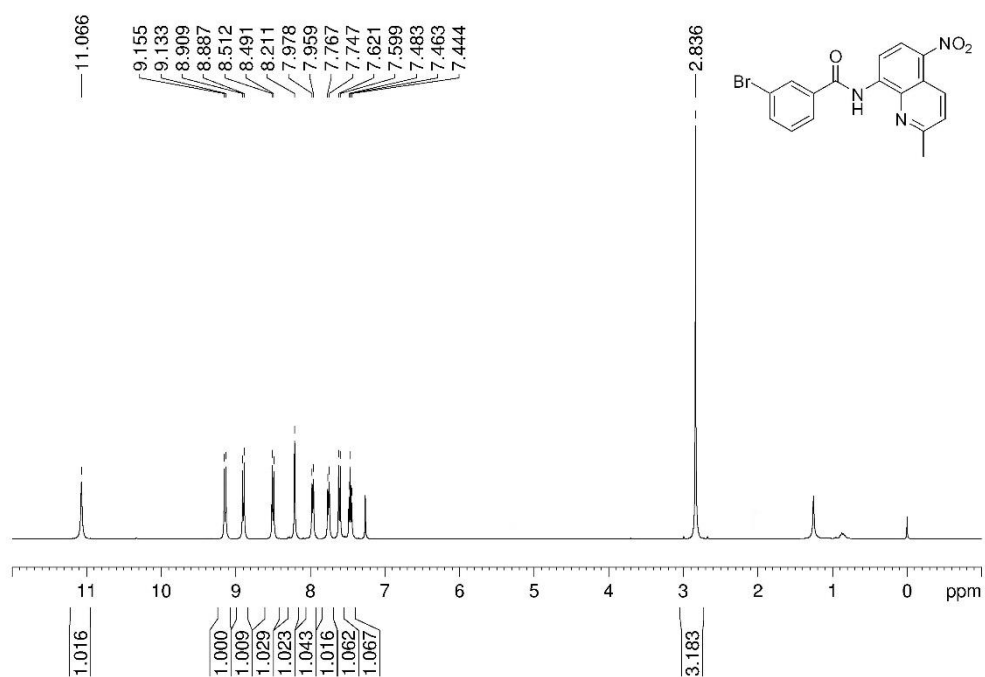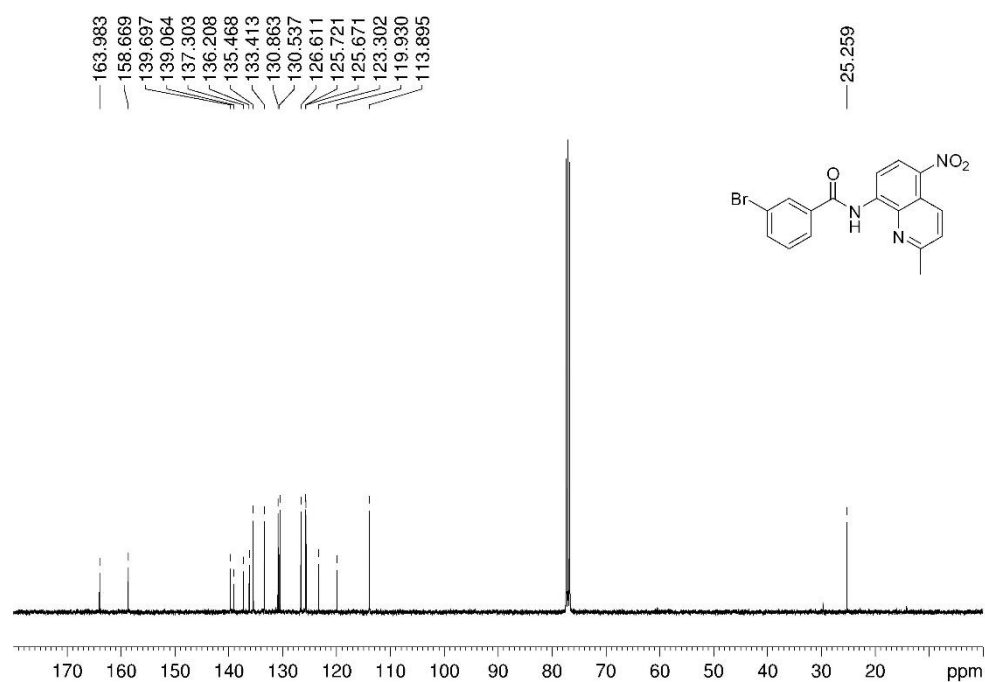

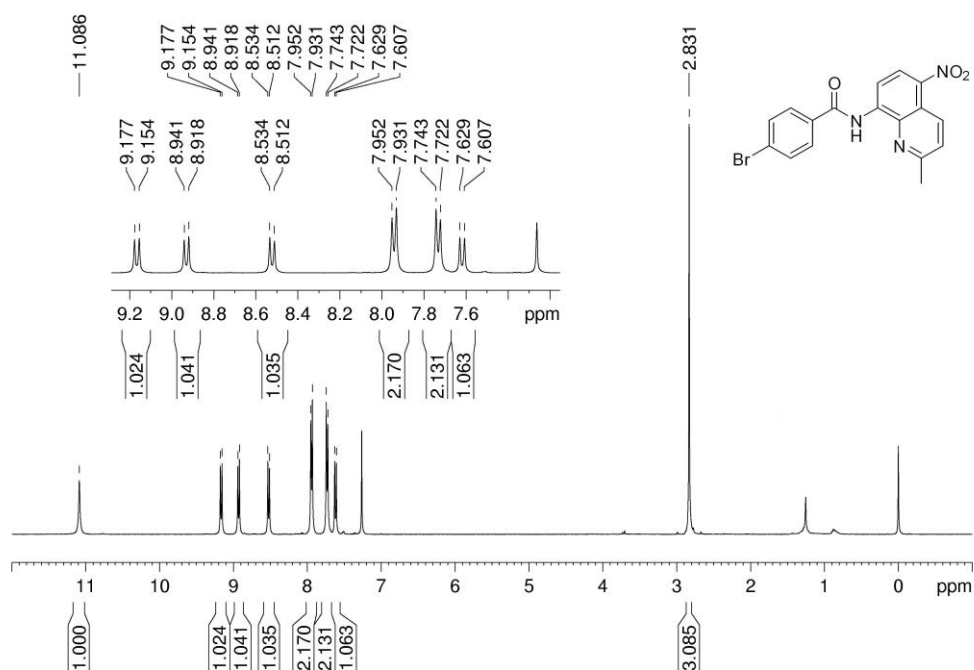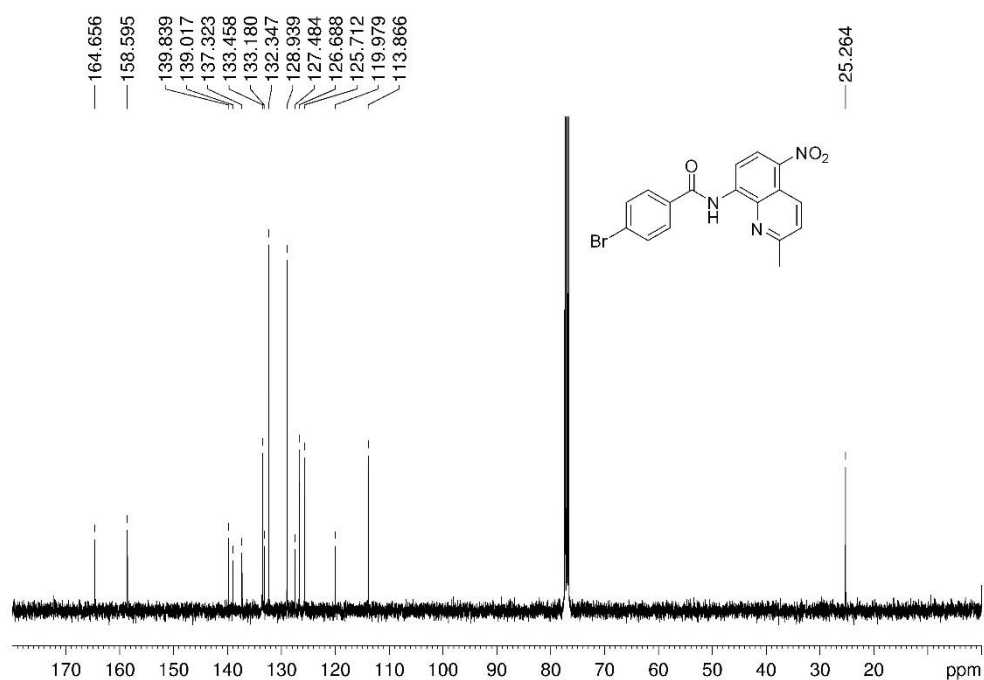

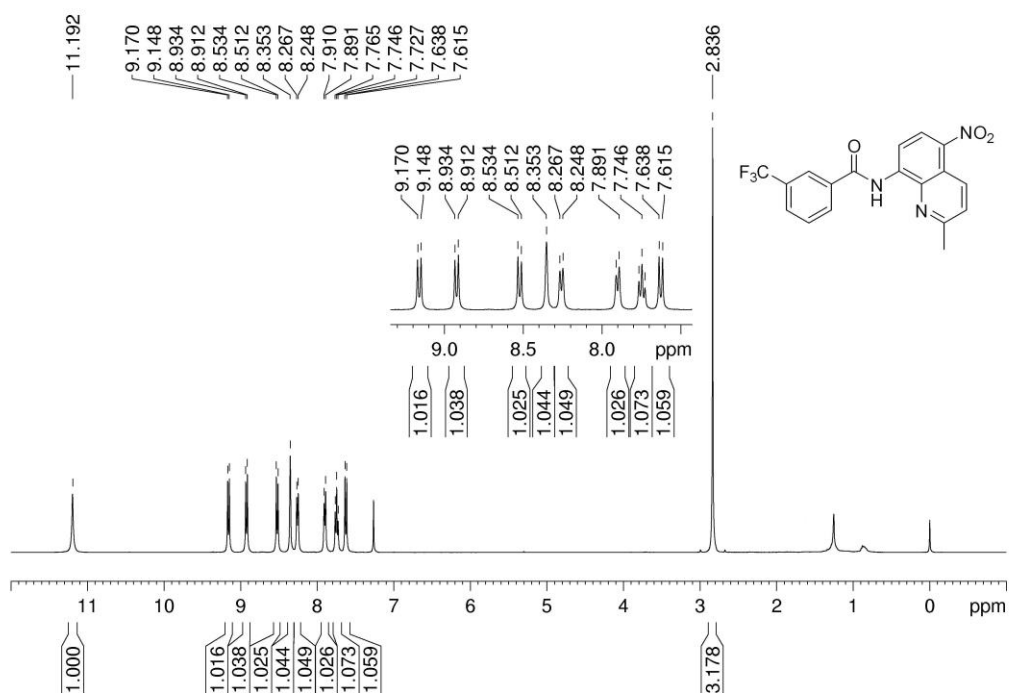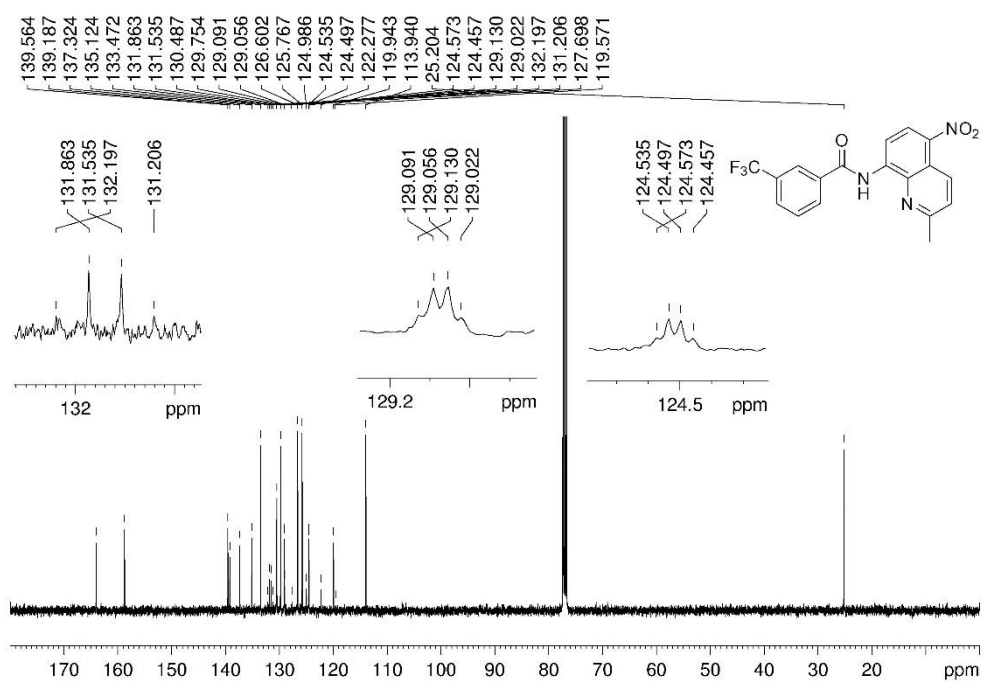

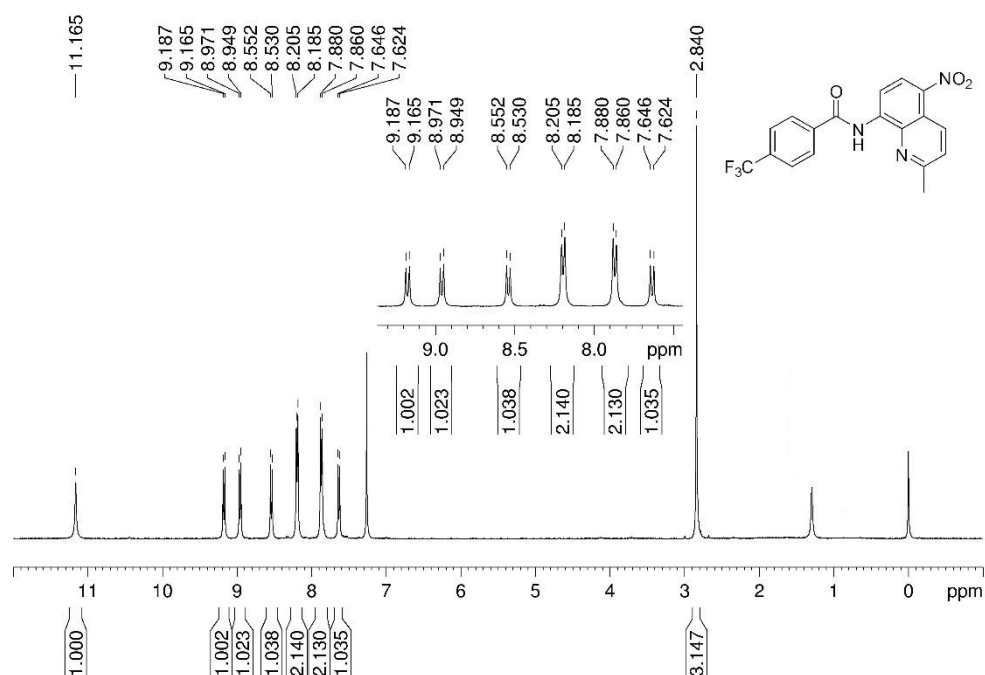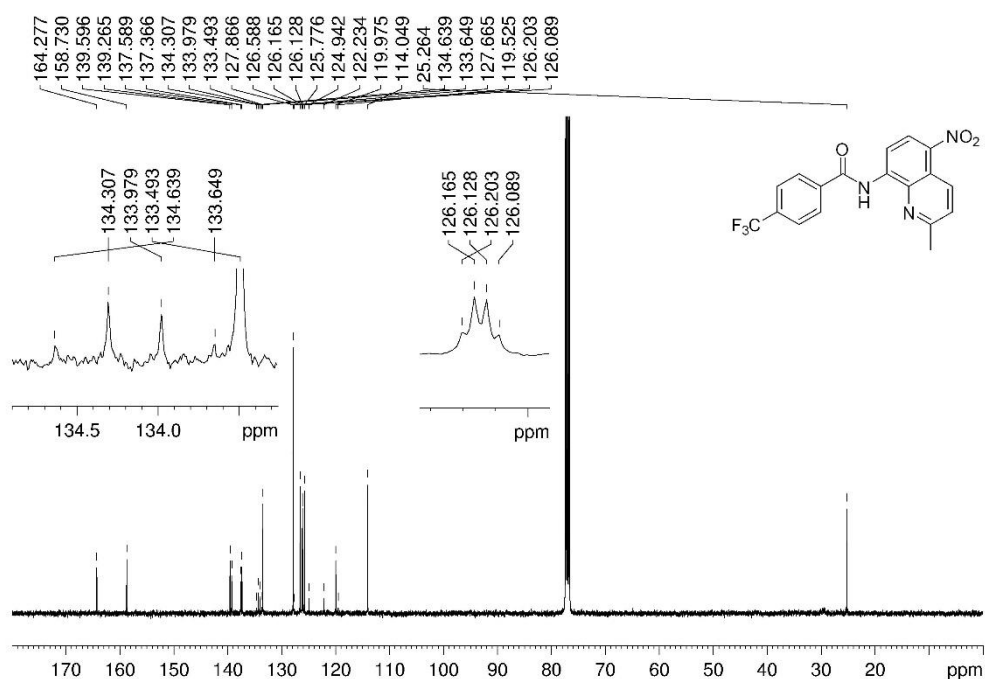

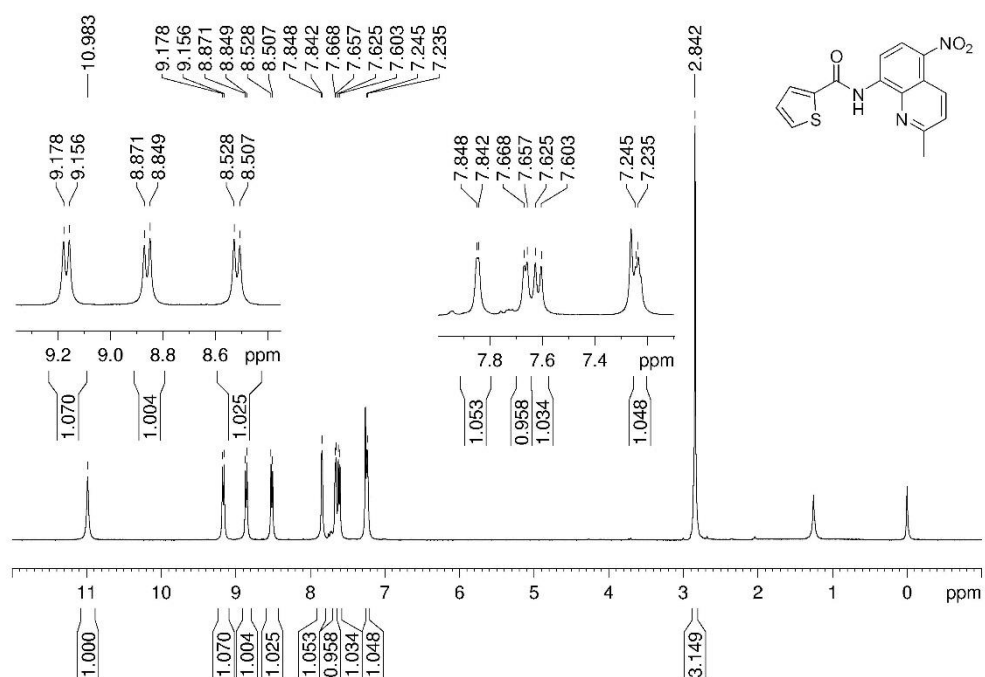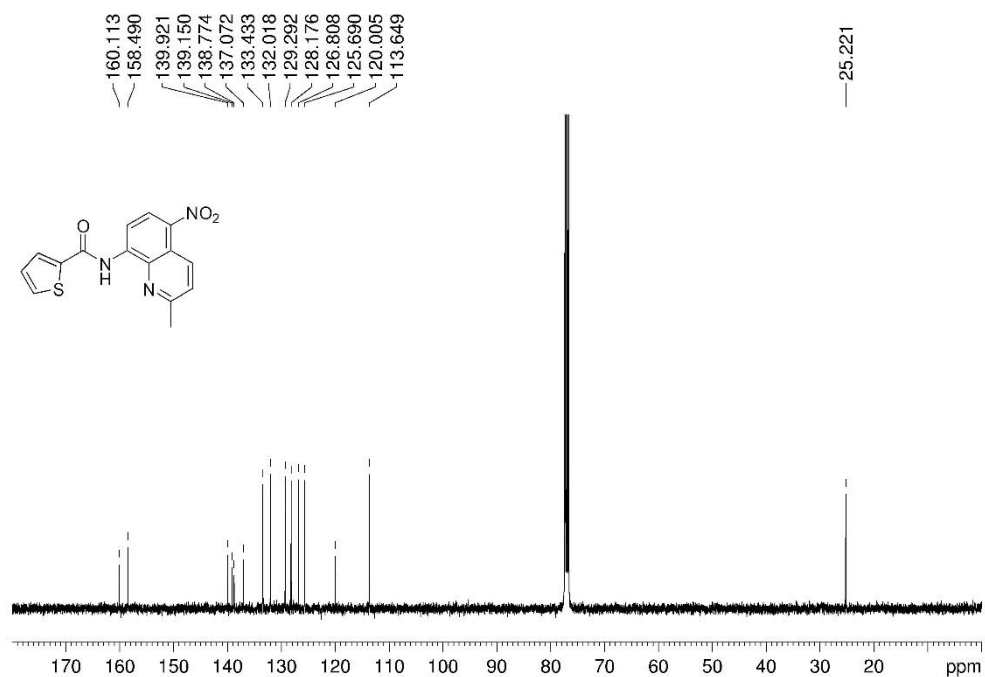

Supplement: s1 [file s1]
